# Supplementary material for: Role of OATP1B1 and OATP1B3 in Drug-Drug Interactions Mediated by Tyrosine Kinase Inhibitors
Source: Pharmaceutics. 2020 Sep 9;12(9):856. doi: 10.3390/pharmaceutics12090856 (PMC7559291; doi:10.3390/pharmaceutics12090856)
Supplement: Supplementary file 1 [file pharmaceutics-12-00856-s001.xlsx]

## Sheet: Table S1
¥ represents TKI as an OATP1B1/3 inhibitor provided by the prescribing information, γ represents TKI is not an inhibitor of OATP1B1/3 provided by the prescribing information
Table S1: Prescribing Information
TKI (generic name)	Trade Name	Indication	Disease	OATP1B1	IC50 or Ki (uM)	OATP1B3	IC50 or Ki(uM)	Fecal %	Urine %	Model/Substrate/Concentration	Substrate for?	Not a substrate for?	Prescribinig information link
Acalabrutinib	Calquence	BTK		γ		γ		84	12			OATP1B1, OATP1B3	https://www.azpicentral.com/calquence/calquence.pdf#page=1
Afatinib	Gilotrif	EGFR, HER2/4	NSCLC					85	4				https://docs.boehringer-ingelheim.com/Prescribing%20Information/PIs/Gilotrif/Gilotrif.pdf?DMW_FORMAT=pdf
Alectinib	Alecensa	ALK	NSCLC	γ		γ		98	<0.5			OATP1B1, OATP1B3.	https://www.gene.com/download/pdf/alecensa_prescribing.pdf
Avapritinib	Ayvakit	PDGFRa, KIT		γ		γ		70	18				https://www.blueprintmedicines.com/uspi/AYVAKIT.pdf
Axitinib	Inlyta	C-KIT, PDGFR	Kidney cancer					41	23				http://labeling.pfizer.com/ShowLabeling.aspx?id=759
Baricitinib	Olumiant	JAK	NHL	γ		¥		20	75				http://pi.lilly.com/us/olumiant-uspi.pdf
Binimetinib	Mektovi	MEK 1, BRAF	Melanoma					62	31			OATP1B1, OATP1B3	http://labeling.pfizer.com/ShowLabeling.aspx?id=12988
Bosutinib	Bosulif	BCR-ABL, SRC	CML	γ		γ		91.3	3.3				http://labeling.pfizer.com/ShowLabeling.aspx?id=884
Brigatinib	Alunbrig	ALK	NSCLC	γ		γ		65	25			OATP1B1, OATP1B3	https://www.alunbrig.com/assets/pi.pdf
Cabozantib	Cabometyx	C-MET	RCC, HCC					54	27				https://www.cabometyx.com/downloads/CABOMETYXUSPI.pdf
Certinib	Zykadia	ALK	NSCLC	γ		γ		68	1.3			OATP1B1	https://www.novartis.us/sites/www.novartis.us/files/zykadia.pdf
Cobimetinib	Cotellic	BRAF, MEK 1/2	Melanoma	γ		γ		76	17.8			OATP1B1, OATP1B3	https://www.gene.com/download/pdf/cotellic_prescribing.pdf
Crizotinib	Xalkori	ALK, ROS1, MET	NSCLC	γ		γ		63	22				http://labeling.pfizer.com/ShowLabeling.aspx?id=676
Dabrafenib	Tafinlar	BRAF	Melanoma	¥		¥		71	23	Coadministration of TAFINLAR 150 mg twice daily with a single dose of rosuvastatin (a sensitive OATP1B1 and OATP1B3 substrate) increased rosuvastatin Cmax by 2.6-fold, but did not change its AUC.		OATP1B1, OATP1B3	https://www.novartis.us/sites/www.novartis.us/files/tafinlar.pdf
Dacomitinitb	Vizimpro	EGFR, HER2/4	NSCLC	γ		γ		79	3				http://labeling.pfizer.com/ShowLabeling.aspx?id=11019
Dasatinib	Sprycel	BCR-ABL, SRC	CML, ALL					85	4				https://packageinserts.bms.com/pi/pi_sprycel.pdf
Encorafenib	Braftovi	BRAF	Melanoma	¥		¥		47	47			OATP1B1, OATP1B3	http://labeling.pfizer.com/ShowLabeling.aspx?id=12990
Entrectinib	Rozlytrek	ROS1, TRKs, ALK	NSCLC					83	3			OATP1B1, OATP1B3	https://www.gene.com/download/pdf/rozlytrek_prescribing.pdf
Erdafitnib	Balversa	FGFRs	Urothelial Caricinoma	γ		γ		69	19				http://www.janssenlabels.com/package-insert/product-monograph/prescribing-information/BALVERSA-pi.pdf
Erlotinib	Tarceva	EGFR	NSCLC					83	8				https://www.gene.com/download/pdf/tarceva_prescribing.pdf
Fedratinib	Inrebic	JAK2	MF	¥		¥		77	5			OATP1B1, OATP1B3	https://media2.celgene.com/content/uploads/inrebic-pi.pdf
Fostamatinib	Tavalisse	SYK	ITP					80	20			OATP1B1, OATP1B3	https://tavalissehcp.com/downloads/pdf/TAVALISSE-Full-Prescribing-Information.pdf
Geftinib	Iressa	EGFR	NSCLC					86	4				https://www.azpicentral.com/iressa/iressa.pdf#page=1
Gilteritinib	Xospata	FLT3/AXL	AML					64.5	16.4				https://astellas.us/docs/xospata.pdf
Ibrutinib	Imbruvica	BTK	MCL,CLL,SLL					80	<10				https://imbruvica.com/files/prescribing-information.pdf
Imatinib	Gleevec	BCR-ABL	CML, ALL, MDS, ASM					68	13				https://www.novartis.us/sites/www.novartis.us/files/gleevec_tabs.pdf
Lapatinib	Tykerb	EGFR, HER2	MBC	¥				27	<2				https://www.novartis.us/sites/www.novartis.us/files/tykerb.pdf
Laroctrectinib	VItrakvi	TRKs	Solid tumors	γ		γ		58	39			OATP1B1, OATP1B3	http://labeling.bayerhealthcare.com/html/products/pi/vitrakvi_PI.pdf
Lenvatinib	Lenvima	VEGFRs	DTC, RCC, HCC	γ		γ		64	25			OATP1B1, OATP1B3	http://www.lenvima.com/pdfs/prescribing-information.pdf
Lorlatinib	Lorbrena	ALK, ROS1	NSCLC	γ		γ		41	48				http://labeling.pfizer.com/ShowLabeling.aspx?id=11140
Midostaurin	Rydapt	FLT3	AML	¥ (CGP52421 and CGP62221)				95	5				https://www.novartis.us/sites/www.novartis.us/files/rydapt.pdf
Neratinib	Nerlynx	EGFR, HER2/4	Breast Cancer					97	1.1				https://nerlynx.com/pdf/full-prescribing-information.pdf
Nilotinib	Tasigna	BCR-ABL	CML					93	not given				https://www.novartis.us/sites/www.novartis.us/files/tasigna.pdf
Nintedanib	Nerlynx	EGFR, HER2/4	Breast Cancer	γ		γ			0.65			OATP1B1, OATP1B3	https://docs.boehringer-ingelheim.com/Prescribing%20Information/PIs/Ofev/ofev.pdf
Osimertinib	Tagrisso	EGFR	NSCLC	γ		γ		68	14			OATP1B1, OATP1B3	https://www.azpicentral.com/tagrisso/tagrisso.pdf#page=1
Pazopanib	Votrient	VEGFRs, PDGFrs, KIT	RCC	¥	0.79			not given	<4				https://www.novartis.us/sites/www.novartis.us/files/votrient.pdf
Pexidartinib	Turalio	CSFR1, KIT, FLT3	TGCT	¥		¥		65	27			OATP1B1, OATP1B3	https://dsi.com/prescribing-information-portlet/getPIContent?productName=Turalio&inline=true
Ponatinib	Iclusig	ABL	CML, ALL	γ		γ		87	5			OATP1B1, OATP1B3	https://www.iclusig.com/pdf/ICLUSIG-Prescribing-Information.pdf
Regorafenib	Stivarga	VEGFR	CRC, GIST, HCC					71	19				http://labeling.bayerhealthcare.com/html/products/pi/Stivarga_PI.pdf
Ruxolitinib	Jakafi	JAK 1/2	MF	γ		γ		22	74				https://www.jakafi.com/pdf/prescribing-information.pdf
Sorafenib	Nexavar	BRAF, FLT3	HCC, RCC					77	19				http://labeling.bayerhealthcare.com/html/products/pi/Nexavar_PI.pdf
Sunitinib	Sutent	PDFGRs, VEGFRs, FLT3	GIST, RCC, pNET					61	16				http://labeling.pfizer.com/showlabeling.aspx?id=607
Tofacitinib	Xeljanz	JAK 1/3	RA, PA, UC	γ		γ		70	30				http://labeling.pfizer.com/ShowLabeling.aspx?id=959
Trametinib	Mekinist	BRAF	Melanoma	γ		γ		80	20			OATP1B1, OATP1B3	https://www.novartis.us/sites/www.novartis.us/files/mekinist.pdf
Upadacitinib	Rinvoq	JAKs	RA	γ		γ		38	24				https://www.rxabbvie.com/pdf/rinvoq_pi.pdf
Vandetinib	Capresla	EGFR, VEGFR	Thyroid cancer					44	25				http://www.caprelsa.com/files/caprelsa-pi.pdf
Vemurafenib	Zelboraf	BRAF, CRAF, ARAF	Melanoma					94	1				https://www.gene.com/download/pdf/zelboraf_prescribing.pdf
Zanbrutinib	Brukinsa	BTK	MCL	γ		γ		87	8			OATP1B1, OATP1B3	https://www.brukinsa.com/prescribing-information.pdf

## Sheet: Table S2
¥ represents TKI as an OATP1B1/3 inhibitor provided by the FDA guidance documents, γ represents TKI is not an inhibitor of OATP1B1/3 provided by the FDA guidance documents
Table S2. FDA guidance for TKI interactions with OATP1B1 and OATP1B3
TKI (generic name)	OATP1B1	IC50 or Ki (uM)	OATP1B3	IC50 or Ki (uM)	Substrate	Not a substrate	Inhibits	Do not inhibit	FDA link
Acalabrutinib	γ		γ			OATP1B1, OATP1B3		OATP1B1, OATP1B3	https://www.accessdata.fda.gov/drugsatfda_docs/nda/2019/210259Orig1s006,%20s007.pdf
Afatinib									https://www.accessdata.fda.gov/drugsatfda_docs/nda/2013/201292Orig1s000ClinPharmR.pdf
Alectinib	γ		γ			OATP1B1 , OATP1B3		OATP1B1, OATP1B3	https://www.accessdata.fda.gov/drugsatfda_docs/nda/2015/208434Orig1s000ClinPharmR.pdf
Avapritinib	γ		γ					OATP1B1, OATP1B3	https://www.accessdata.fda.gov/drugsatfda_docs/nda/2020/212608Orig1s000MultidisciplineR.pdf
Axitinib					OATP1B1, OATP1B3				https://www.accessdata.fda.gov/drugsatfda_docs/nda/2012/202324Orig1s000ClinPharmR.pdf
Baricitinib									https://www.accessdata.fda.gov/drugsatfda_docs/nda/2018/207924Orig1s000MedR.pdf
Binimetinib						OATP1B1, OATP1B3			https://www.accessdata.fda.gov/drugsatfda_docs/nda/2018/210498Orig1s000MultidisciplineR.pdf
Bosutinib									https://www.accessdata.fda.gov/drugsatfda_docs/nda/2012/203341Orig1s000PharmR.pdf
Brigatinib	γ		γ			OATP1B1, OATP1B3,		OATP1B1, OATP1B3	https://www.accessdata.fda.gov/drugsatfda_docs/nda/2017/208772Orig1s000MultidisciplineR.pdf
Cabozantib									https://www.accessdata.fda.gov/drugsatfda_docs/nda/2012/203756Orig1s000ClinPharmR.pdf
Ceritinib	¥	>5	¥	>5		OATP1B1	OATP1B1, OATP1B3		https://www.accessdata.fda.gov/drugsatfda_docs/nda/2014/205755Orig1s000ClinPharmR.pdf
Cobimetinib	γ	118	γ	85				OATP1B1, OATP1B3	https://www.accessdata.fda.gov/drugsatfda_docs/nda/2015/206192Orig1s000ClinPharmR.pdf
Crizotinib	¥	48	¥	44			OATP1B1, OATP1B3		https://www.accessdata.fda.gov/drugsatfda_docs/nda/2011/202570Orig1s000ClinPharmR.pdf
Dabrafenib	¥	1.4	¥	4.7					https://www.accessdata.fda.gov/drugsatfda_docs/nda/2013/202806Orig1s000ClinPharmR.pdf
Dacomitinitb	γ		γ					OATP1B1,OATP1B3	https://www.accessdata.fda.gov/drugsatfda_docs/nda/2018/211288Orig1s000MultidisciplineR.pdf
Dasatinib									https://www.accessdata.fda.gov/drugsatfda_docs/nda/2006/021986s000_Sprycel__ClinPharmR.pdf
Encorafenib	¥	5.35	¥	6.16		OATP1B1, OATP1B3	OATP1B1, OATP1B3		https://www.accessdata.fda.gov/drugsatfda_docs/nda/2018/210496Orig1s000MultidisciplineR.pdf
Entrectinib	¥					OATP1B1, OATP1B3	OATP1B1		https://www.accessdata.fda.gov/drugsatfda_docs/nda/2019/212725Orig1s000,%20212726Orig1s000MultidisciplineR.pdf
Erdafitnib									https://www.accessdata.fda.gov/drugsatfda_docs/nda/2019/212018Orig1s000MultidisciplineR.pdf
Erlotinib									https://www.accessdata.fda.gov/drugsatfda_docs/nda/2004/21-743_Tarceva_biopharmr.PDF
Fedratinib	¥	16.4	¥	9.51		OATP1B1, OATP1B3	OATP1B1, OATP1B3		https://www.accessdata.fda.gov/drugsatfda_docs/nda/2019/212327Orig1s000MultidisciplineR.pdf
Fostamatinib									https://www.accessdata.fda.gov/drugsatfda_docs/nda/2018/209299Orig1s000MultidisciplineR.pdf
Geftinib									https://www.accessdata.fda.gov/drugsatfda_docs/nda/2003/21-399_IRESSA_Clinr.pdf
Gilteritinib	¥	29					OATP1B1		https://www.accessdata.fda.gov/drugsatfda_docs/nda/2018/211349Orig1s000MultidisciplineR.pdf
Ibrutinib						OATP1B1, OATP1B3			https://www.accessdata.fda.gov/drugsatfda_docs/nda/2014/205552s001.pdf
Imatinib									https://www.accessdata.fda.gov/drugsatfda_docs/nda/2002/21-335S004_Gleevec_biopharmr.pdf
Lapatinib	¥	4.02					OATP1B1		https://www.accessdata.fda.gov/drugsatfda_docs/nda/2007/022059s000_ClinPharmR.pdf
Laroctrectinib	γ		γ			OATP1B1, OATP1B3		OATP1B1, OATP1B3	https://www.accessdata.fda.gov/drugsatfda_docs/nda/2018/210861Orig1s000_211710Orig1s000MultidisciplineR.pdf
Lenvatinib	¥	7.29	γ	>30		OATP1B1, OATP1B3	OATP1B1, OATP1B3	OATP1B3	https://www.accessdata.fda.gov/drugsatfda_docs/nda/2015/206947Orig1s000ClinPharmR.pdf
Lorlatinib	γ	32.6	γ	>100				OATP1B1, OATP1B3	https://www.accessdata.fda.gov/drugsatfda_docs/nda/2018/210868Orig1s000MultidisciplineR.pdf
Midostaurin	¥	0.3 to ~1.3	¥	5			OATP1A1, OATP1B3		https://www.accessdata.fda.gov/drugsatfda_docs/nda/2017/207997Orig1Orig2s000ClinPharmR.pdf
Neratinib									https://www.accessdata.fda.gov/drugsatfda_docs/nda/2017/208051Orig1s000MultidisciplineR.pdf
Nilotinib									https://www.accessdata.fda.gov/drugsatfda_docs/nda/2007/022068s000_ClinPharmR.pdf
Nintedanib	γ	10 (14 for BIBF1202)	γ	10 (79 for BIBF1202)	OATP1B1 (BIBF1202), OATP2B1 (BIBF1202)	OATP1B1, OATP1B3		OATP1B1, OATP1B3	https://www.accessdata.fda.gov/drugsatfda_docs/nda/2014/205832Orig1s000ClinPharmR.pdf
Osimertinib	γ	22	γ	52.5		OATP1B1, OATP1B3		OATP1B1, OATP1B3	https://www.accessdata.fda.gov/drugsatfda_docs/nda/2015/208065Orig1s000ClinPharmR.pdf
Pazopanib	¥	0.79						OATP1B1	accessdata.fda.gov/drugsatfda_docs/nda/2009/022465s000_ClinPharmR.pdf
Pexidartinib	¥	5.16	¥	13		OATP1B1, OATP1B3	OATP1B1, OATP1B3		https://www.accessdata.fda.gov/drugsatfda_docs/nda/2019/211810Orig1s000MultidisciplineR.pdf
Ponatinib	γ		γ			OATP1B1, OATP1B3		OATP1B1, OATP1B3	https://www.accessdata.fda.gov/drugsatfda_docs/nda/2012/203469Orig1s000ClinPharmR.pdf
Regorafenib	γ		γ			OATP1B1, OATP1B3		OATP1B1, OATP1B3	https://www.accessdata.fda.gov/drugsatfda_docs/nda/2012/203085Orig1s000ClinPharmR.pdf
Ruxolitinib	γ	19.3	γ	20.5				OATP1B1, OATP1B3	https://www.accessdata.fda.gov/drugsatfda_docs/nda/2011/202192Orig1s000ClinPharmR.pdf
Sorafenib									https://www.accessdata.fda.gov/drugsatfda_docs/nda/2005/021923_s000_Nexavar_BioPharmR.pdf
Sunitinib									https://www.accessdata.fda.gov/drugsatfda_docs/nda/2006/021938_S000_Sutent_BioPharmR.pdf
Tofacitinib	γ	55.3	γ	>100				OATP1B1, OATP1B3	https://www.accessdata.fda.gov/drugsatfda_docs/nda/2012/203214Orig1s000ClinPharmR.pdf
Trametinib	γ	1.3	γ	0.94				OATP1B1, OATP1B3	https://www.accessdata.fda.gov/drugsatfda_docs/nda/2013/204114Orig1s000ClinPharmR.pdf
Upadacitinib	γ		γ			OATP1B1, OATP1B3	OATP1B1	OATP1B1, OATP1B3	https://www.accessdata.fda.gov/drugsatfda_docs/nda/2019/211675Orig1s000ClinPharmR.pdf
Vandetinib									https://www.accessdata.fda.gov/drugsatfda_docs/nda/2011/022405Orig1s000ClinPharmR.pdf
Vemurafenib	γ		γ			OATP1B1, OATP1B3		OATP1B1, OATP1B3	https://www.accessdata.fda.gov/drugsatfda_docs/nda/2011/202429Orig1s000ClinPharmR.pdf
Zanbrutinib	γ		γ			OATP1B1, OATP1B3		OATP1B1, OATP1B3	https://www.accessdata.fda.gov/drugsatfda_docs/nda/2019/213217Orig1s000MultidisciplineR.pdf

## Sheet: Table S3
¥ represents TKI as an OATP1B1/3 inhibitor provided by the EMA guidance documents, γ represents TKI is not an inhibitor of OATP1B1/3 provided by the EMA guidance documents
Table S3. EMA guidance for TKI interactions with OATP1B1 and OATP1B3										Notes
TKI (generic name)	OATP1B1	IC50 or Ki (uM)	OATP1B3	IC50 or Ki (uM)	Substrate	Not a substrate	Inhibits	Did not inhibit	EMA link
Acalabrutinib
Afatinib	γ	82.8	γ	71.2		OATP2B1, OATP1B1	OATP1B1, OATP1B3		https://www.ema.europa.eu/en/documents/assessment-report/giotrif-epar-public-assessment-report_en.pdf	0-100 μM
Alectinib									https://www.ema.europa.eu/en/documents/assessment-report/alecensa-epar-public-assessment-report_en.pdf
Avapritinib
Axitinib					OATP1B1, OATP1B3				https://www.ema.europa.eu/en/documents/assessment-report/inlyta-epar-public-assessment-report_en.pdf
Baricitinib	γ		γ			OATP1B1, OATP1B3			https://www.ema.europa.eu/en/documents/assessment-report/olumiant-epar-public-assessment-report_en.pdf	Not clinically significant
Binimetinib	γ	23.6 ± 9.6	γ	~29			OATP1B1, OATP1B3		https://www.ema.europa.eu/en/documents/assessment-report/mektovi-epar-public-assessment-report_en.pdf	OCT2: IC50 18.1 ± 1.3 μM
Bosutinib									https://www.ema.europa.eu/en/documents/assessment-report/bosulif-epar-public-assessment-report_en.pdf
Brigatinib	γ		γ			OATP1B1, OATP1B3			https://www.ema.europa.eu/en/documents/assessment-report/alunbrig-epar-public-assessment-report_en.pdf
Cabozantib	γ		γ			OATP1B1, OATP1B3		OATP1B1, OATP1B3	https://www.ema.europa.eu/en/documents/assessment-report/cabometyx-epar-public-assessment-report_en.pdf
Certinib	γ	>5	γ	>5	OATP1B1			OATP1B1, OATP1B3	https://www.ema.europa.eu/en/documents/assessment-report/zykadia-epar-public-assessment-report_en.pdf
Cobimetinib	¥	>49	¥	>49		OATP1B1, OATP1B3	OATP1B1, OATP1B3		https://www.ema.europa.eu/en/documents/assessment-report/cotellic-epar-public-assessment-report_en.pdf
Crizotinib								OATP1B1, OATP1B3	https://www.ema.europa.eu/en/documents/assessment-report/xalkori-epar-public-assessment-report_en.pdf
Dabrafenib	¥	1.4	¥	4.7			OATP1B1, OATP1B3		https://www.ema.europa.eu/documents/assessment-report/tafinlar-epar-public-assessment-report_en.pdf	Metabolites are also inhibitors
Dacomitinitb	γ		γ			OATP1B1, OATP1B3		OATP1B1, OATP1B3	https://www.ema.europa.eu/documents/assessment-report/vizimpro-epar-public-assessment-report_en.pdf
Dasatinib									https://www.ema.europa.eu/en/documents/variation-report/sprycel-h-c-709-ii-0059-epar-assessment-report-variation_en.pdf
Encorafenib	¥		¥			OATP1B1, OATP1B3	OATP1B1, OATP1B3		https://www.ema.europa.eu/documents/assessment-report/braftovi-epar-public-assessment-report_en.pdf
Entrectinib
Erdafitnib
Erlotinib									https://www.ema.europa.eu/en/documents/variation-report/tarceva-h-c-618-ii-0043-epar-assessment-report-variation_en.pdf
Fedratinib
Fostamatinib	γ					OATP1B1		OATP1B1	https://www.ema.europa.eu/en/documents/assessment-report/tavlesse-epar-public-assessment-report_en.pdf
Geftinib									https://www.ema.europa.eu/documents/assessment-report/iressa-epar-public-assessment-report_en.pdf
Gilteritinib	¥	29.4	γ	>50			OATP1B1	OATP1B3	https://www.ema.europa.eu/en/documents/assessment-report/xospata-epar-public-assessment-report_en.pdf
Ibrutinib						OATP1B1, OATP1B3			https://www.ema.europa.eu/en/documents/assessment-report/imbruvica-epar-public-assessment-report_en.pdf
Imatinib									https://www.ema.europa.eu/en/documents/assessment-report/imatinib-teva-epar-public-assessment-report_en.pdf
Lapatinib	¥	4.02					OATP1B1		https://www.ema.europa.eu/en/documents/assessment-report/tyverb-epar-public-assessment-report_en.pdf
Laroctrectinib	¥	48	γ			OATP1B1, OATP1B3		OATP1B3	https://www.ema.europa.eu/en/documents/assessment-report/vitrakvi-epar-public-assessment-report_en.pdf
Lenvatinib	¥	7.29	γ	>30		OATP1B1, OATP1B3	OATP1B1	OATP1B3	https://www.ema.europa.eu/en/documents/assessment-report/lenvima-epar-public-assessment-report_en.pdf
Lorlatinib	¥		¥			OATP1B1, OATP1B3	OATP1B1, OATP1B3		https://www.ema.europa.eu/en/documents/assessment-report/lorviqua-epar-public-assessment-report_en.pdf
MIdostaurin	¥		γ				OATP1B1	OATP1B3	https://www.ema.europa.eu/en/documents/assessment-report/rydapt-epar-public-assessment-report_en.pdf
Neratinib	γ	>10	γ	>10		OATP1B1, OATP1B3		OATP1B1, OATP1B3	https://www.ema.europa.eu/en/documents/assessment-report/nerlynx-epar-public-assessment-report_en.pdf
Nilotinib									https://www.ema.europa.eu/en/documents/product-information/tasigna-epar-product-information_en.pdf
Nintedanib	γ	>10	γ	>10		OATP1B1, OATP1B3		OATP1B1, OATP1B3	https://www.ema.europa.eu/en/documents/assessment-report/vargatef-epar-public-assessment-report_en.pdf
Osimertinib	¥	22	¥	52.5		OATP1B1, OATP1B3	OATP1B1, OATP1B3		https://www.ema.europa.eu/en/documents/assessment-report/tagrisso-epar-public-assessment-report_en.pdf
Pazopanib	¥				OATP1B1		OATP1B1		https://www.ema.europa.eu/en/documents/assessment-report/votrient-epar-public-assessment-report_en.pdf
Pexidartinib									https://www.ema.europa.eu/documents/product-information/nexavar-epar-product-information_en.pdf
Ponatinib	γ		γ			OATP1B1, OATP1B3		OATP1B1, OATP1B3	https://www.ema.europa.eu/en/documents/assessment-report/iclusig-epar-public-assessment-report_en.pdf
Regorafenib						OATP1B1, OATP1B3			https://www.ema.europa.eu/en/documents/assessment-report/stivarga-epar-public-assessment-report_en.pdf
Ruxolitinib									https://www.ema.europa.eu/en/documents/assessment-report/jakavi-epar-public-assessment-report_en.pdf
Sorafenib
Sunitinib
Tofacitinib	γ		γ			OATP1B1, OATP1B3		OATP1B1, OAT1B3	https://www.ema.europa.eu/en/documents/assessment-report/xeljanz-epar-public-assessment-report_en-0.pdf
Trametinib	γ		γ				OATP1B1, OATP1B3		https://www.ema.europa.eu/en/documents/assessment-report/mekinist-epar-public-assessment-report_en.pdf
Upadacitinib	γ		γ			OATP1B1, OATP1B3		OATP1B1, OATP1B3	https://www.ema.europa.eu/en/documents/assessment-report/rinvoq-epar-public-assessment-report_en.pdf
Vandetinib									https://www.ema.europa.eu/en/documents/assessment-report/caprelsa-epar-public-assessment-report_en.pdf
Vemurafenib	γ	<50	γ	<50		OATP1B1, OATP1B3		OATP1B1, OATP1B3	https://www.ema.europa.eu/en/documents/assessment-report/zelboraf-epar-public-assessment-report_en.pdf
Zanbrutinib

## Sheet: Table S4
¥ represents TKI as an OATP1B1/3 inhibitor provided by the prescribing information, FDA guidance, or EMA guidance. γ represents TKI is not an inhibitor of OATP1B1/3 prescribing information, FDA guidance, or EMA guidance
Table S4. Comparison of PI, FDA, and EMA regulatory documents
TKI	OATP1B1			OATP1B3
	PI	FDA	EMA	PI	FDA	EMA
Acalabrutinib	γ	γ		γ	γ
Afatinib			γ			γ
Alectinib	γ	γ		γ	γ
Avapritinib	γ	γ		γ	γ
Axitinib
Baricitinib	γ	γ	γ	¥	¥	γ
Binimetinib			γ			γ
Bosutinib	γ	γ		γ	γ
Brigatinib	γ	γ	γ	γ	γ	γ
Cabozantib			γ			γ
Certinib	γ	¥	γ	γ	¥	γ
Cobimetinib	γ	γ	¥	γ	γ	¥
Crizotinib	γ	¥		γ	¥
Dabrafenib	¥	¥	¥	¥	¥	¥
Dacomitinitb	γ	γ	γ	γ	γ	γ
Dasatinib
Encorafenib	¥	¥	¥	¥	¥	¥
Entrectinib		¥
Erdafitnib	γ			γ
Erlotinib
Fedratinib	¥	¥		¥	¥
Fostamatinib			γ
Geftinib
Gilteritinib		¥	¥			γ
Ibrutinib
Imatinib
Lapatinib	¥	¥	¥
Laroctrectinib	γ	γ	¥	γ	γ	γ
Lenvatinib	γ	¥	¥	γ	γ	γ
Lorlatinib	γ	γ	¥	γ	γ	¥
Midostaurin	¥ (CGP52421 and CGP62221)	¥	¥		¥	γ
Neratinib			γ			γ
Nilotinib
Nintedanib	γ	γ	γ	γ	γ	γ
Osimertinib	γ	γ	¥	γ	γ	¥
Pazopanib	¥	¥	¥
Pexidartinib	¥	¥		¥	¥
Ponatinib	γ	γ	γ	γ	γ	γ
Regorafenib		γ			γ
Ruxolitinib	γ	γ		γ	γ
Sorafenib
Sunitinib
Tofacitinib	γ	γ	γ	γ	γ	γ
Trametinib	γ	γ	γ	γ	γ	γ
Upadacitinib	γ	γ	γ	γ	γ	γ
Vandetinib
Vemurafenib		γ	γ		γ	γ
Zanbrutinib	γ	γ		γ	γ

## Sheet: Table S5
Table S5. In vitro studies for TKIs as perptrators in OATP-mediated DDIs
TKI	Parent/Metabolite	OATP1B1 inhibitor?	Reported values	OATP1B3 inhibitor?	Reported values	Model	Pre-Incubation (mins)	Incubation (mins)	Substrate	Method	PMID (or DOI)	Reference Link
Acalabrutinib	Parent	No		No							10.1158/1538-7445.AM2019-13	Podoll, Terry, et al. "Structure elucidation, metabolism, and drug interaction potential of ACP-5862, an active, major, circulating metabolite of acalabrutinib." (2019): 13-13.
Afatinib	Parent	No	250% stimulation at 30 uM			HEK/OATP1B1	10	2	FL (3 mM)	fluorescence		Koide, Hiroyoshi, et al. "Substrate-dependent effects of molecular-targeted anticancer agents on activity of organic anion transporting polypeptide 1B1." Xenobiotica 48.10 (2018): 1059-1071.
Afatinib	Parent	No				HEK/OATP1B1	10	2	DCF (1 mM)	absorbance		Koide, Hiroyoshi, et al. "Substrate-dependent effects of molecular-targeted anticancer agents on activity of organic anion transporting polypeptide 1B1." Xenobiotica 48.10 (2018): 1059-1071.
Afatinib	Parent	No				HEK/OATP1B1	10	2	atorvastatin (0.5 mM)	LCMS/MS		Koide, Hiroyoshi, et al. "Substrate-dependent effects of molecular-targeted anticancer agents on activity of organic anion transporting polypeptide 1B1." Xenobiotica 48.10 (2018): 1059-1071.
Afatinib	Parent	No	150% stimulation at 30 uM			HEK/OATP1B1	10	0.5	SN-38 (1 mM)			Koide, Hiroyoshi, et al. "Substrate-dependent effects of molecular-targeted anticancer agents on activity of organic anion transporting polypeptide 1B1." Xenobiotica 48.10 (2018): 1059-1071.
Afatinib	Parent	No				HEK/OATP1B1	10	0.5	valsartan (1 mM)			Koide, Hiroyoshi, et al. "Substrate-dependent effects of molecular-targeted anticancer agents on activity of organic anion transporting polypeptide 1B1." Xenobiotica 48.10 (2018): 1059-1071.
Afatinib	Parent	No	119 ± 4% function remaining after incubation with 10uM	Yes	66 ± 3% function remaining after incubation with 10uM	HEK293/OATP1B1 or 3	None?	8	300nM E3S (1B1) or 2nM CCK-8 (1B3)	radioactivity	25165131	Johnston, Rosie A., et al. "Selective inhibition of human solute carrier transporters by multikinase inhibitors." Drug Metabolism and Disposition 42.11 (2014): 1851-1857.
Axatinib	Parent	yes	>90% inhibition at 10 uM			Flp-In T-Rex293 cells transfected with OATP1B1*1A	15 min	5	[3H]estradiol-17b-D-glucuronide (E2G) (0.1 mM;	radioactivity		Hu, Shuiying, et al. "Inhibition of OATP1B1 by tyrosine kinase inhibitors: in vitro–in vivo correlations." British journal of cancer 110.4 (2014): 894-898.
Axatinib	Parent	yes	>90% inhibition on 10 uM of E2G, >70% inhibtion on 8Fc-A			HEK293/OATP1B1	15 min		estradiol-17β-ᴅ-glucuronide, 8-(2-[fluoresceinyl]-aminoethylthio)-adenosine-3′,5′-cyclic monophosphate	radioactivity	29337310	Leblanc, Alix F., et al. "OATP1B2 deficiency protects against paclitaxel-induced neurotoxicity." The Journal of clinical investigation 128.2 (2018): 816-825.
Bosutinib	Parent	yes	>60% inhibition at 10 uM			Flp-In T-Rex293 cells transfected with OATP1B1*1A	15 min	5	[3H]estradiol-17b-D-glucuronide (E2G) (0.1 mM;	radioactivity		Hu, Shuiying, et al. "Inhibition of OATP1B1 by tyrosine kinase inhibitors: in vitro–in vivo correlations." British journal of cancer 110.4 (2014): 894-898.
Bosutinib	Parent	No	121 ± 6% function remaining after incubation with 10uM	No	109 ± 5% function remaining after incubation with 10uM	HEK293/OATP1B1 or 3	None?	8	300nM E3S (1B1) or 2nM CCK-8 (1B3)	radioactivity	25165131	Johnston, Rosie A., et al. "Selective inhibition of human solute carrier transporters by multikinase inhibitors." Drug Metabolism and Disposition 42.11 (2014): 1851-1857.
Bosutinib	Parent	yes	>25% 10 uM on E2G, >50% on 8Fc-A			HEK293/OATP1B1	15 min		estradiol-17β-ᴅ-glucuronide, 8-(2-[fluoresceinyl]-aminoethylthio)-adenosine-3′,5′-cyclic monophosphate	radioactivity	29337310	Leblanc, Alix F., et al. "OATP1B2 deficiency protects against paclitaxel-induced neurotoxicity." The Journal of clinical investigation 128.2 (2018): 816-825.
Cabozantib	EXEL-1644	Yes	50% inhibition at 6.1 uM	Yes	50% inhibition at 20.6 uM	MDCK-II cell monolayers	Unclear.	Unclear incubation times. 5 minutes on a shaker?	OATP1B1: 2mM 3H-estradiol-17b-D-glucuronide; OATP1B3: 2mM3H-cholecystokinin-8	radioactivity	26015560	Lacy, Steven, et al. "Metabolism and disposition of cabozantinib in healthy male volunteers and pharmacologic characterization of its major metabolites." Drug Metabolism and Disposition 43.8 (2015): 1190-1207.
Cabozantib	Parent	No	>15uM	No	>10uM	MDCK-II cell monolayers	Unclear.	Unclear.	OATP1B1 0.5mM3H-estradiol-17b-D-glucuronide; OATP1B3: 1mM3H-cholecystokininoctapeptide	radioactivity	26015560	Lacy, Steven, et al. "Metabolism and disposition of cabozantinib in healthy male volunteers and pharmacologic characterization of its major metabolites." Drug Metabolism and Disposition 43.8 (2015): 1190-1207.
Cabozantib	Parent	Yes	59% inhibition at 30 uM			HEK/OATP1B1		2	3uM fluorescein (FL)	absorbance	29034773	Koide, Hiroyoshi, et al. "Substrate-dependent effects of molecular-targeted anticancer agents on activity of organic anion transporting polypeptide 1B1." Xenobiotica 48.10 (2018): 1059-1071.
Cabozantib	Parent	Yes	61% inhibition at 30 uM			HEK/OATP1B1		2	1uM 2′,7′-dichlorofluorescein (DCF)	absorbance	29034773	Koide, Hiroyoshi, et al. "Substrate-dependent effects of molecular-targeted anticancer agents on activity of organic anion transporting polypeptide 1B1." Xenobiotica 48.10 (2018): 1059-1071.
Cabozantib	Parent	Yes	74% inhibition at 30 uM			HEK/OATP1B1		2	1uM Valsartan	LCMS/MS	29034773	Koide, Hiroyoshi, et al. "Substrate-dependent effects of molecular-targeted anticancer agents on activity of organic anion transporting polypeptide 1B1." Xenobiotica 48.10 (2018): 1059-1071.
Ceritinib	Parent	Yes	50% inhibition at 30 uM			HEK/OATP1B1	10	2	FL (3 mM)	fluorescence		Koide, Hiroyoshi, et al. "Substrate-dependent effects of molecular-targeted anticancer agents on activity of organic anion transporting polypeptide 1B1." Xenobiotica 48.10 (2018): 1059-1071.
Ceritinib	Parent	Yes	50% inhibition at 30 uM			HEK/OATP1B1	10	2	DCF (1 mM)	fluorescence		Koide, Hiroyoshi, et al. "Substrate-dependent effects of molecular-targeted anticancer agents on activity of organic anion transporting polypeptide 1B1." Xenobiotica 48.10 (2018): 1059-1071.
Ceritinib	Parent	Yes	50% inhibition at 30 uM			HEK/OATP1B1	10	2	atorvastatin (0.5 mM)	fluorescence		Koide, Hiroyoshi, et al. "Substrate-dependent effects of molecular-targeted anticancer agents on activity of organic anion transporting polypeptide 1B1." Xenobiotica 48.10 (2018): 1059-1071.
Ceritinib	Parent	Yes	50% inhibition at 30uM			HEK/OATP1B1	10	0.5	SN-38 (1 mM)	fluorescence		Koide, Hiroyoshi, et al. "Substrate-dependent effects of molecular-targeted anticancer agents on activity of organic anion transporting polypeptide 1B1." Xenobiotica 48.10 (2018): 1059-1071.
Ceritinib	Parent	No	150% stimulation at 30uM			HEK/OATP1B1	10	0.5	valsartan (1 mM)	fluorescence		Koide, Hiroyoshi, et al. "Substrate-dependent effects of molecular-targeted anticancer agents on activity of organic anion transporting polypeptide 1B1." Xenobiotica 48.10 (2018): 1059-1071.
Crizotinib	Parent	No		No		HEK/OATP1B1 or 1B3		See Substrate	11nM [3H]E3S for 15 seconds (1B1) 50nM [3H]TCA for 2 minutes (1B3) 0.5 uM fluvastatin (5 minutes; 1B1) 2 uM fluvastatin (5 minutes; 1B1)	radioactivity	28005438	Sato, Toshihiro, et al. "Interactions of crizotinib and gefitinib with organic anion-transporting polypeptides (OATP) 1B1, OATP1B3 and OATP2B1: gefitinib shows contradictory interaction with OATP1B3." Xenobiotica 48.1 (2018): 73-78.
Crizotinib	Parent	Yes	>25% inhibition at 10 uM			HEK293/OATP1B1	15 min		estradiol-17β-ᴅ-glucuronide, 8-(2-[fluoresceinyl]-aminoethylthio)-adenosine-3′,5′-cyclic monophosphate	radioactivity	29337310	Leblanc, Alix F., et al. "OATP1B2 deficiency protects against paclitaxel-induced neurotoxicity." The Journal of clinical investigation 128.2 (2018): 816-825.
Dabrafenib	Parent	Yes	50% inhibition at 1.4 uM	Yes	50% inhibition at 4.7 uM	CHO-OATP1B1 or HEK-MSRII cells, transduced with BacMam baculovirus containing human OATP1B1 or OATP1B3	15 to 30 minutes	5 minutes for CHO-OATP1B1 cells, 3 minutes for HEK-OATP1B1 cells, and 10 minutes for HEK-OATP1B3 cells	0.02 mM [3H]EG	LC/MS/MS.		Ellens, Harma, et al. "Prediction of the transporter-mediated drug-drug interaction potential of dabrafenib and its major circulating metabolites." Drug Metabolism and Disposition 45.6 (2017): 646-656.
Dabrafenib	Hydroxy-Dabrafenib	Yes	50% inhibition at 4.3 uM	Yes	50% inhibition at 23 uM	CHO-OATP1B1 or HEK-MSRII cells, transduced with BacMam baculovirus containing human OATP1B1 or OATP1B3	15 to 30 minutes	5 minutes for CHO-OATP1B1 cells, 3 minutes for HEK-OATP1B1 cells, and 10 minutes for HEK-OATP1B3 cells	0.02 mM [3H]EG	LC/MS/MS.		Ellens, Harma, et al. "Prediction of the transporter-mediated drug-drug interaction potential of dabrafenib and its major circulating metabolites." Drug Metabolism and Disposition 45.6 (2017): 646-656.
Dabrafenib	Carboxy-Dabrafenib	Yes	50% inhibition at 18uM	Yes	50% inhibition at 20 uM	CHO-OATP1B1 or HEK-MSRII cells, transduced with BacMam baculovirus containing human OATP1B1 or OATP1B3	15 to 30 minutes	5 minutes for CHO-OATP1B1 cells, 3 minutes for HEK-OATP1B1 cells, and 10 minutes for HEK-OATP1B3 cells	0.02 mM [3H]EG	LC/MS/MS.		Ellens, Harma, et al. "Prediction of the transporter-mediated drug-drug interaction potential of dabrafenib and its major circulating metabolites." Drug Metabolism and Disposition 45.6 (2017): 646-656.
Dabrafenib	Desmethyl-Dabrafenib	Yes	50% inhibition at 0.83 uM	Yes	50% inhibition at 4.3	CHO-OATP1B1 or HEK-MSRII cells, transduced with BacMam baculovirus containing human OATP1B1 or OATP1B3	15 to 30 minutes	5 minutes for CHO-OATP1B1 cells, 3 minutes for HEK-OATP1B1 cells, and 10 minutes for HEK-OATP1B3 cells	0.02 mM [3H]EG	LC/MS/MS.		Ellens, Harma, et al. "Prediction of the transporter-mediated drug-drug interaction potential of dabrafenib and its major circulating metabolites." Drug Metabolism and Disposition 45.6 (2017): 646-656.
Dasatinib	Parent	Yes	50% inhibition at 4.81 ± 1.7 uM (no pretreatment) 50% inhibition at 2.33 ± 0.86 uM (pre-treatment)	Yes	50% inhibition at 5.76 ± 1.1 uM (no pretreatment) 50% inhibition at 2.75 ± 1.17 uM (pre-treatment	HEK/OATP1B1 or 1B3	2 min	2	[3H]-E217βG (1 μM, 2 min) (pre- and co-)	Radioactivity	28373111	Pahwa, Sonia, et al. "Pretreatment with rifampicin and tyrosine kinase inhibitor dasatinib potentiates the inhibitory effects toward OATP1B1-and OATP1B3-mediated transport." Journal of pharmaceutical sciences 106.8 (2017): 2123-2135.
Dasatinib	Parent	yes	>50% inhibition at 10 uM			HEK293/OATP1B1	15 min		estradiol-17β-ᴅ-glucuronide, 8-(2-[fluoresceinyl]-aminoethylthio)-adenosine-3′,5′-cyclic monophosphate	radioactivity	29337310	Leblanc, Alix F., et al. "OATP1B2 deficiency protects against paclitaxel-induced neurotoxicity." The Journal of clinical investigation 128.2 (2018): 816-825.
Dasatinib	Parent	yes	~65% inhibition at 10uM			OATP1B1 in Flp-In T-Rex29	15	5	0.1uM estradiol-17b-D-glucuronide	Radioactivity	24398510	Hu, Shuiying, et al. "Inhibition of OATP1B1 by tyrosine kinase inhibitors: in vitro–in vivo correlations." British journal of cancer 110.4 (2014): 894-898.
Erlotinib	Parent	No		No		OATP-1B1 and -1B3 transfected CHO cells		10	0.25 μCi/mL of [3H]ES (for OATP-1B1) or [3H]CCK-8 (for OATP-1B3)	radioactivity	https://doi.org/10.1515/dmdi-2014-0014	Khurana, Varun, et al. "Inhibition of OATP-1B1 and OATP-1B3 by tyrosine kinase inhibitors." Drug Metabolism and Personalized Therapy 29.4 (2014): 249-259.
Erlotinib	Parent	yes	>60% decrease at 10 uM			Flp-In T-Rex293 cells transfected with OATP1B1*1A	15	5	[3H]estradiol-17b-D-glucuronide (E2G) (0.1 mM;	radioactivity		Hu, Shuiying, et al. "Inhibition of OATP1B1 by tyrosine kinase inhibitors: in vitro–in vivo correlations." British journal of cancer 110.4 (2014): 894-898.
Erlotinib	Parent	No	104 ± 5% function remaining after incubation with 10uM	Yes,	50% inhibition at 1.19uM	HEK293/OATP1B1 or 3	None?	8	300nM E3S (1B1) or 2nM CCK-8 (1B3)	radioactivity	25165131	Johnston, Rosie A., et al. "Selective inhibition of human solute carrier transporters by multikinase inhibitors." Drug Metabolism and Disposition 42.11 (2014): 1851-1857.
Erlotinib	Parent	yes	>25% inhibtion at 10 uM on E2G, >50% inhibition on 8Fc-A			HEK293/OATP1B1	15		estradiol-17β-ᴅ-glucuronide, 8-(2-[fluoresceinyl]-aminoethylthio)-adenosine-3′,5′-cyclic monophosphate	radioactivity	29337310	Leblanc, Alix F., et al. "OATP1B2 deficiency protects against paclitaxel-induced neurotoxicity." The Journal of clinical investigation 128.2 (2018): 816-825.
Fostamatinib	Parent	No	>10 uM				15	2	[3H]estradiol glucuronide (0.02mM)	Radioactivity	26700956	Elsby, Robert, et al. "Solitary inhibition of the breast cancer resistance protein efflux transporter results in a clinically significant drug-drug interaction with rosuvastatin by causing up to a 2-fold increase in statin exposure." Drug Metabolism and Disposition 44.3 (2016): 398-408.
Geftinib	Parent	yes	>70% decrease with 10 uM			Flp-In T-Rex293 cells transfected with OATP1B1*1A	15	5	[3H]estradiol-17b-D-glucuronide (E2G) (0.1 mM;	radioactivity		Hu, Shuiying, et al. "Inhibition of OATP1B1 by tyrosine kinase inhibitors: in vitro–in vivo correlations." British journal of cancer 110.4 (2014): 894-898.
Geftinib	Parent	yes	50% inhibition at 17.2±1.47 uM,	yes	18.8± 2.74 mM	Human embryonic kidney (HEK293) cells transduced with OATP1B1, OATP1B3,			fluvastatin	LC/MS/MS		Sato, Toshihiro, et al. "Interactions of crizotinib and gefitinib with organic anion-transporting polypeptides (OATP) 1B1, OATP1B3 and OATP2B1: gefitinib shows contradictory interaction with OATP1B3." Xenobiotica 48.1 (2018): 73-78.
Geftinib	Parent			no (inducer?)	EC50 value of 14.1±4.6 mM	Human embryonic kidney (HEK293) cells transduced with OATP1B1, OATP1B3,			[3H]TCA	LC/MS/MS		Sato, Toshihiro, et al. "Interactions of crizotinib and gefitinib with organic anion-transporting polypeptides (OATP) 1B1, OATP1B3 and OATP2B1: gefitinib shows contradictory interaction with OATP1B3." Xenobiotica 48.1 (2018): 73-78.
Geftinib	Parent	No	105 ± 3% function remaining after incubation with 10uM	No	78 ± 3% function remaining after incubation with 10uM	HEK293/OATP1B1 or 3	None?	8	300nM E3S (1B1) or 2nM CCK-8 (1B3)	radioactivity	25165131	Johnston, Rosie A., et al. "Selective inhibition of human solute carrier transporters by multikinase inhibitors." Drug Metabolism and Disposition 42.11 (2014): 1851-1857.
Geftinib	Parent	yes	>25% inhibition at 10 uM on E2G, >75% inhibition on 8Fc-A			HEK293/OATP1B1	15		estradiol-17β-ᴅ-glucuronide, 8-(2-[fluoresceinyl]-aminoethylthio)-adenosine-3′,5′-cyclic monophosphate	radioactivity	29337310	Leblanc, Alix F., et al. "OATP1B2 deficiency protects against paclitaxel-induced neurotoxicity." The Journal of clinical investigation 128.2 (2018): 816-825.
Imatinib	Parent	yes	~20% inhibition at 10uM			OATP1B1 in Flp-In T-Rex29	15	5	0.1mM [3H]estradiol-17b-D-glucuronide (E2G)	Radioactivity	24398510	Hu, Shuiying, et al. "Inhibition of OATP1B1 by tyrosine kinase inhibitors: in vitro–in vivo correlations." British journal of cancer 110.4 (2014): 894-898..pdf
Imatinib	Parent	No				OATP-transduced Sf9 cells	5	10	1uM Na-Fluo	Absorbance	26415544	Patik, Izabel, et al. "Functional expression of the 11 human Organic Anion Transporting Polypeptides in insect cells reveals that sodium fluorescein is a general OATP substrate." Biochemical pharmacology 98.4 (2015): 649-658.
Imatinib	Parent	yes	>25% inhibition at 10 uM on both			HEK293/OATP1B1	15		estradiol-17β-ᴅ-glucuronide, 8-(2-[fluoresceinyl]-aminoethylthio)-adenosine-3′,5′-cyclic monophosphate	radioactivity	29337310	Leblanc, Alix F., et al. "OATP1B2 deficiency protects against paclitaxel-induced neurotoxicity." The Journal of clinical investigation 128.2 (2018): 816-825.
Lapatanib	Parent	yes	>70% inhibtion at 10 uM			HEK293/OATP1B1	15		estradiol-17β-ᴅ-glucuronide, 8-(2-[fluoresceinyl]-aminoethylthio)-adenosine-3′,5′-cyclic monophosphate	radioactivity	29337310	Leblanc, Alix F., et al. "OATP1B2 deficiency protects against paclitaxel-induced neurotoxicity." The Journal of clinical investigation 128.2 (2018): 816-825.
Lapatanib	Parent	yes	>70% inhibtion at 10 uM			OATP1B1 in Flp-In T-Rex29	15	5	0.1mM [3H]estradiol-17b-D-glucuronide (E2G)	radioactivity	24398510	Hu, Shuiying, et al. "Inhibition of OATP1B1 by tyrosine kinase inhibitors: in vitro–in vivo correlations." British journal of cancer 110.4 (2014): 894-898..pdf
Lapatanib	Parent	no		yes, slight inhibition		OATP-1B1 and -1B3 transfected CHO cells		10	fluro-methotrexate	fluoresence	26469880	Kotsampasakou, Eleni, et al. "Identification of novel inhibitors of organic anion transporting polypeptides 1B1 and 1B3 (OATP1B1 and OATP1B3) using a consensus vote of six classification models." Molecular pharmaceutics 12.12 (2015): 4395-4404.
Lapatanib	Parent	yes	50% inhibition at 4.0 uM (Sd:2.1)			CHO-OATP1B1	15-30	5	3H Estradiol 17 -D-glucuronide	radioactivity		Polli, Joseph W., et al. "The role of efflux and uptake transporters in N-{3-chloro-4-[(3-fluorobenzyl) oxy] phenyl}-6-[5-({[2-(methylsulfonyl) ethyl] amino} methyl)-2-furyl]-4-quinazolinamine (GW572016, lapatinib) disposition and drug interactions." Drug metabolism and disposition 36.4 (2008): 695-701.
Lapatanib	Parent	No	123 ± 13% function remaining after incubation with 10uM	No	98 ± 16% function remaining after incubation with 10uM	HEK293/OATP1B1 or 3	None?	8	300nM E3S (1B1) or 2nM CCK-8 (1B3)	radioactivity	25165131	Johnston, Rosie A., et al. "Selective inhibition of human solute carrier transporters by multikinase inhibitors." Drug Metabolism and Disposition 42.11 (2014): 1851-1857.
Lenvatinib	Parent	Yes	70% inhibition at 30uM			HEK/OATP1B1	10	2	FL (3 mM)	fluorescence		Koide, Hiroyoshi, et al. "Substrate-dependent effects of molecular-targeted anticancer agents on activity of organic anion transporting polypeptide 1B1." Xenobiotica 48.10 (2018): 1059-1071.
Lenvatinib	Parent	Yes	70% inhibition at 30uM			HEK/OATP1B1	10	2	DCF (1 mM)	fluorescence		Koide, Hiroyoshi, et al. "Substrate-dependent effects of molecular-targeted anticancer agents on activity of organic anion transporting polypeptide 1B1." Xenobiotica 48.10 (2018): 1059-1071.
Lenvatinib	Parent	Yes	70% inhibition at 30uM			HEK/OATP1B1	10	2	atorvastatin (0.5 mM)	fluorescence		Koide, Hiroyoshi, et al. "Substrate-dependent effects of molecular-targeted anticancer agents on activity of organic anion transporting polypeptide 1B1." Xenobiotica 48.10 (2018): 1059-1071.
Lenvatinib	Parent	Yes	70% inhibition at 30uM			HEK/OATP1B1	10	0.5	SN-38 (1 mM)	fluorescence		Koide, Hiroyoshi, et al. "Substrate-dependent effects of molecular-targeted anticancer agents on activity of organic anion transporting polypeptide 1B1." Xenobiotica 48.10 (2018): 1059-1071.
Lenvatinib	Parent	Yes	70% inhibition at 30uM			HEK/OATP1B1	10	0.5	valsartan (1 mM)	fluorescence		Koide, Hiroyoshi, et al. "Substrate-dependent effects of molecular-targeted anticancer agents on activity of organic anion transporting polypeptide 1B1." Xenobiotica 48.10 (2018): 1059-1071.
Neratinib	Parent	No				HEK/OATP1B1	10	2	FL (3 mM)	fluorescence		Koide, Hiroyoshi, et al. "Substrate-dependent effects of molecular-targeted anticancer agents on activity of organic anion transporting polypeptide 1B1." Xenobiotica 48.10 (2018): 1059-1071.
Neratinib	Parent	No				HEK/OATP1B1	10	2	DCF (1 mM)	fluorescence		Koide, Hiroyoshi, et al. "Substrate-dependent effects of molecular-targeted anticancer agents on activity of organic anion transporting polypeptide 1B1." Xenobiotica 48.10 (2018): 1059-1071.
Neratinib	Parent	No				HEK/OATP1B1	10	2	atorvastatin (0.5 mM)	fluorescence		Koide, Hiroyoshi, et al. "Substrate-dependent effects of molecular-targeted anticancer agents on activity of organic anion transporting polypeptide 1B1." Xenobiotica 48.10 (2018): 1059-1071.
Neratinib	Parent	Yes	30% inhibition at 30uM			HEK/OATP1B1	10	0.5	SN-38 (1 mM)	fluorescence		Koide, Hiroyoshi, et al. "Substrate-dependent effects of molecular-targeted anticancer agents on activity of organic anion transporting polypeptide 1B1." Xenobiotica 48.10 (2018): 1059-1071.
Neratinib	Parent	No				HEK/OATP1B1	10	0.5	valsartan (1 mM)	fluorescence		Koide, Hiroyoshi, et al. "Substrate-dependent effects of molecular-targeted anticancer agents on activity of organic anion transporting polypeptide 1B1." Xenobiotica 48.10 (2018): 1059-1071.
Neratinib	Parent	No	123 ± 13% function remaining after incubation with 10uM	Yes	50% inhibition at 18.13 ± 1.21	HEK293/OATP1B1 or 3	None?	8	300nM E3S (1B1) or 2nM CCK-8 (1B3)	radioactivity	25165131	Johnston, Rosie A., et al. "Selective inhibition of human solute carrier transporters by multikinase inhibitors." Drug Metabolism and Disposition 42.11 (2014): 1851-1857.
Nilotinib	Parent	No				HEK/OATP1B1	10	2	FL (3 mM)	fluorescence		Koide, Hiroyoshi, et al. "Substrate-dependent effects of molecular-targeted anticancer agents on activity of organic anion transporting polypeptide 1B1." Xenobiotica 48.10 (2018): 1059-1071.
Nilotinib	Parent	Yes	~50% inhibition at 30uM			HEK/OATP1B1	10	2	DCF (1 mM)	fluorescence		Koide, Hiroyoshi, et al. "Substrate-dependent effects of molecular-targeted anticancer agents on activity of organic anion transporting polypeptide 1B1." Xenobiotica 48.10 (2018): 1059-1071.
Nilotinib	Parent	Yes	~50% inhibition at 30uM			HEK/OATP1B1	10	2	atorvastatin (0.5 mM)	fluorescence		Koide, Hiroyoshi, et al. "Substrate-dependent effects of molecular-targeted anticancer agents on activity of organic anion transporting polypeptide 1B1." Xenobiotica 48.10 (2018): 1059-1071.
Nilotinib	Parent	Yes	~50% inhibition at 30uM			HEK/OATP1B1	10	0.5	SN-38 (1 mM)	fluorescence		Koide, Hiroyoshi, et al. "Substrate-dependent effects of molecular-targeted anticancer agents on activity of organic anion transporting polypeptide 1B1." Xenobiotica 48.10 (2018): 1059-1071.
Nilotinib	Parent	Yes	~50% inhibition at 30uM			HEK/OATP1B1	10	0.5	valsartan (1 mM)	fluorescence		Koide, Hiroyoshi, et al. "Substrate-dependent effects of molecular-targeted anticancer agents on activity of organic anion transporting polypeptide 1B1." Xenobiotica 48.10 (2018): 1059-1071.
Nilotinib	Parent	yes	>95% inhibition at 10 uM			OATP1B1 in Flp-In T-Rex29	10	5	0.1mM [3H]estradiol-17b-D-glucuronide (E2G)	radioactivity	24398510	Hu, Shuiying, et al. "Inhibition of OATP1B1 by tyrosine kinase inhibitors: in vitro–in vivo correlations." British journal of cancer 110.4 (2014): 894-898..pdf
Nilotinib	Parent	No	110 ± 7% stimulation at 10uM	No	100 ± 3% function remaining after incubation with 10uM	HEK293/OATP1B1 or 3	None?	8	300nM E3S (1B1) or 2nM CCK-8 (1B3)	radioactivity	25165131	Johnston, Rosie A., et al. "Selective inhibition of human solute carrier transporters by multikinase inhibitors." Drug Metabolism and Disposition 42.11 (2014): 1851-1857.
Nilotinib	Parent	yes	>80% inhibtion at 0-20uM			HEK/OATP1B1			8‐[2‐ [Fluoresceinyl]‐aminoethylthio)‐adenosine‐3′,5′‐cyclic‐monophosphate (5–40 μM) or estradiol‐b‐glucuronide (2 μM)		https://doi.org/10.1096/fasebj.2020.34.s1.05391	Hayden, Elizabeth R. "Phosphorylation and function of OATP1B1 with tyrosine kinase inhibitors." The FASEB Journal 34.S1 (2020): 1-1.
Nilotinib	Parent	Yes	50% inhibition at 1.3μM	Yes		HEK293/OATP1B1 or 3			Estradiol-β-glucuronide or 8-(2-[Fluoresceinyl]-aminoethylthio)-adenosine-3′,5′-cyclicmonophosphate (8FcA),			Sprowl, Jason A., et al. "Characterization of OATP1B1 and OATP1B3 inhibition by Nilotinib." The FASEB Journal 33.S1 (2019): 507-6.
Nilotinib	Parent	yes	>50% at 10 uM, IC50: ~1 μM			HEK293/OATP1B1	15	15	estradiol-17β-ᴅ-glucuronide, 8-(2-[fluoresceinyl]-aminoethylthio)-adenosine-3′,5′-cyclic monophosphate	radioactivity	29337310	Leblanc, Alix F., et al. "OATP1B2 deficiency protects against paclitaxel-induced neurotoxicity." The Journal of clinical investigation 128.2 (2018): 816-825.
Nilotinib	Parent	yes	50% inhibition at 2.78 ± 1.13 μM	No		Human OATP-1B1 and -1B3 transfected CHO cells		10	0.25 μCi/mL of [3H]ES (for OATP-1B1) or [3H]CCK-8 (for OATP-1B3)		https://doi.org/10.1515/dmdi-2014-0014	Khurana, Varun, et al. "Inhibition of OATP-1B1 and OATP-1B3 by tyrosine kinase inhibitors." Drug Metabolism and Personalized Therapy 29.4 (2014): 249-259.
Nintedanib	Parent	No	312% stimulation at 30uM			HEK/OATP1B1		2	3uM fluorescein (FL)	absorbance	29034773	Koide, Hiroyoshi, et al. "Substrate-dependent effects of molecular-targeted anticancer agents on activity of organic anion transporting polypeptide 1B1." Xenobiotica 48.10 (2018): 1059-1071.
Nintedanib	Parent	Yes	74% inhibition at 30uM			HEK/OATP1B1		2	1uM 2′,7′-dichlorofluorescein (DCF)	absorbance	29034773	Koide, Hiroyoshi, et al. "Substrate-dependent effects of molecular-targeted anticancer agents on activity of organic anion transporting polypeptide 1B1." Xenobiotica 48.10 (2018): 1059-1071.
Nintedanib	Parent	No	133% stimulation at 30uM			HEK/OATP1B1		2	1uM Valsartan	absorbance	29034773	Koide, Hiroyoshi, et al. "Substrate-dependent effects of molecular-targeted anticancer agents on activity of organic anion transporting polypeptide 1B1." Xenobiotica 48.10 (2018): 1059-1071.
Nintedanib	Parent	Yes	78% inhibition at 30uM			HEK/OATP1B1		2	1 μM SN-38	absorbance	29034773	Koide, Hiroyoshi, et al. "Substrate-dependent effects of molecular-targeted anticancer agents on activity of organic anion transporting polypeptide 1B1." Xenobiotica 48.10 (2018): 1059-1071.
Pazopanib	Parent	No	120% stimulation at 30uM			HEK/OATP1B1	10	2	FL (3 mM)	absorbance		Koide, Hiroyoshi, et al. "Substrate-dependent effects of molecular-targeted anticancer agents on activity of organic anion transporting polypeptide 1B1." Xenobiotica 48.10 (2018): 1059-1071.
Pazopanib	Parent	No				HEK/OATP1B1	10	2	DCF (1 mM)	absorbance		Koide, Hiroyoshi, et al. "Substrate-dependent effects of molecular-targeted anticancer agents on activity of organic anion transporting polypeptide 1B1." Xenobiotica 48.10 (2018): 1059-1071.
Pazopanib	Parent	No				HEK/OATP1B1	10	2	atorvastatin (0.5 mM)	absorbance		Koide, Hiroyoshi, et al. "Substrate-dependent effects of molecular-targeted anticancer agents on activity of organic anion transporting polypeptide 1B1." Xenobiotica 48.10 (2018): 1059-1071.
Pazopanib	Parent	No				HEK/OATP1B1	10	0.5	SN-38 (1 mM)	absorbance		Koide, Hiroyoshi, et al. "Substrate-dependent effects of molecular-targeted anticancer agents on activity of organic anion transporting polypeptide 1B1." Xenobiotica 48.10 (2018): 1059-1071.
Pazopanib	Parent	No				HEK/OATP1B1	10	0.5	valsartan (1 mM)	absorbance		Koide, Hiroyoshi, et al. "Substrate-dependent effects of molecular-targeted anticancer agents on activity of organic anion transporting polypeptide 1B1." Xenobiotica 48.10 (2018): 1059-1071.
Pazopanib	Parent	yes	50% inhibition 3.89 ± 1.21 μM	No		Human OATP-1B1 and -1B3 transfected CHO cells		10	0.25 μCi/mL of [3H]ES (for OATP-1B1) or [3H]CCK-8 (for OATP-1B3)		https://doi.org/10.1515/dmdi-2014-0014	Khurana, Varun, et al. "Inhibition of OATP-1B1 and OATP-1B3 by tyrosine kinase inhibitors." Drug Metabolism and Personalized Therapy 29.4 (2014): 249-259.
Pazopanib	Parent	yes	>50% inhibition with 8Fc-A, >90% inhibition with E2G			HEK293/OATP1B1	15	15	estradiol-17β-ᴅ-glucuronide (1B1), 8-(2-[fluoresceinyl]-aminoethylthio)-adenosine-3′,5′-cyclic monophosphate (1B1, 1B3)	radioactivity	29337310	Leblanc, Alix F., et al. "OATP1B2 deficiency protects against paclitaxel-induced neurotoxicity." The Journal of clinical investigation 128.2 (2018): 816-825.
Pazopanib	Parent	Yes	50% inhibition at 0.79 uM			CHO-OATP1B1	15-30	5	17b-D-glucuronide ([3H]-EG)	radioactivity	10.1038/sj.bjc.6605653	Xu, C. F., et al. "Pazopanib-induced hyperbilirubinemia is associated with Gilbert's syndrome UGT1A1 polymorphism." British journal of cancer 102.9 (2010): 1371-1377.
Pazopanib	Parent	No				HEK293/OATP1B1			SN-38	reverse-phase HPLC method	https://doi.org/10.1007/s00280-019-03784-8	Iwase, Mariko, et al. "Pazopanib interacts with irinotecan by inhibiting UGT1A1-mediated glucuronidation, but not OATP1B1-mediated hepatic uptake, of an active metabolite SN-38." Cancer chemotherapy and pharmacology 83.5 (2019): 993-998.
Pazopanib	Parent	yes	>95% inhibition at 10 uM			OATP1B1 in Flp-In T-Rex29	15	5	0.1mM [3H]estradiol-17b-D-glucuronide (E2G)	radioactivity	24398510	Hu, Shuiying, et al. "Inhibition of OATP1B1 by tyrosine kinase inhibitors: in vitro–in vivo correlations." British journal of cancer 110.4 (2014): 894-898..pdf
Pazopanib	Parent	Yes	IC50 E1S: 1.42 ± 0.23, IC50 E2G: 13.5 ± 6.0			HEK293/OATP1B1	0	0.5	[3H]estrone-3-sulfate (E1S) and [3H] estradiol-17b-glucuronide	radioactivity		Taguchi, Takayuki, et al. "Short-lasting inhibition of hepatic uptake transporter OATP1B1 by tyrosine kinase inhibitor pazopanib." Drug Metabolism and Pharmacokinetics 34.6 (2019): 372-379.
Pazopanib	Parent	Yes	IC50 E1S:0.594 ± 0.030 IC50 E2G: 7.25 ± 0.53			HEK293/OATP1B2	1	0.5	[3H]estrone-3-sulfate (E1S) and [3H] estradiol-17b-glucuronide	radioactivity		Taguchi, Takayuki, et al. "Short-lasting inhibition of hepatic uptake transporter OATP1B1 by tyrosine kinase inhibitor pazopanib." Drug Metabolism and Pharmacokinetics 34.6 (2019): 372-379.
Pazopanib	Parent	Yes	IC50 E1S: 0.374 ± 0.074, IC50 E2G: 2.58 ± 0.77			HEK293/OATP1B4	30	0.5	[3H]estrone-3-sulfate (E1S) and [3H] estradiol-17b-glucuronide	radioactivity		Taguchi, Takayuki, et al. "Short-lasting inhibition of hepatic uptake transporter OATP1B1 by tyrosine kinase inhibitor pazopanib." Drug Metabolism and Pharmacokinetics 34.6 (2019): 372-379.
Pazopanib	Parent	Yes	IC50 E1S: 0.530 ± 0.022, IC50 E2G:2.03 ± 0.71			HEK293/OATP1B5	60	0.5	[3H]estrone-3-sulfate (E1S) and [3H] estradiol-17b-glucuronide	radioactivity		Taguchi, Takayuki, et al. "Short-lasting inhibition of hepatic uptake transporter OATP1B1 by tyrosine kinase inhibitor pazopanib." Drug Metabolism and Pharmacokinetics 34.6 (2019): 372-379.
Regorafenib	Parent	No	30% stimulation			HEK293/OATP1B6	10	2	Atorvastatin (0.5 mM)	fluorescence		Koide, Hiroyoshi, et al. "Substrate-dependent effects of molecular-targeted anticancer agents on activity of organic anion transporting polypeptide 1B1." Xenobiotica 48.10 (2018): 1059-1071.
Regorafenib	Parent	yes	50% inhibition at ~10 uM	no		HEK293/OATP1B1/1B3	2	2	estrone-3-sulfate (1B1)/taurocholic acid (1B3)			Ohya, Hiroki, et al. "Regorafenib is transported by the organic anion transporter 1B1 and the multidrug resistance protein 2." Biological and Pharmaceutical Bulletin (2015): b14-00740.
Regorafenib	Parent	yes	>50% inhibition at 10 uM			OATP1B1 in Flp-In T-Rex29	15	5	0.1mM [3H]estradiol-17b-D-glucuronide (E2G)	radioactivity	24398510	Hu, Shuiying, et al. "Inhibition of OATP1B1 by tyrosine kinase inhibitors: in vitro–in vivo correlations." British journal of cancer 110.4 (2014): 894-898..pdf
Regorafenib	Parent	yes	>50% inhibition			HEK293/OATP1B1	15		estradiol-17β-ᴅ-glucuronide, 8-(2-[fluoresceinyl]-aminoethylthio)-adenosine-3′,5′-cyclic monophosphate	radioactivity		Leblanc, Alix F., et al. "OATP1B2 deficiency protects against paclitaxel-induced neurotoxicity." The Journal of clinical investigation 128.2 (2018): 816-825.
Roxulotinib	Parent	yes	>25% inhibition at 10 uM on 8Fc-A			HEK293/OATP1B1	15		estradiol-17β-ᴅ-glucuronide, 8-(2-[fluoresceinyl]-aminoethylthio)-adenosine-3′,5′-cyclic monophosphate	radioactivity	29337310	Leblanc, Alix F., et al. "OATP1B2 deficiency protects against paclitaxel-induced neurotoxicity." The Journal of clinical investigation 128.2 (2018): 816-825.
Ruxolitinib	Parent	No				HepaRG		Unclear - 30 minute co-incubation per	4 nM E3S	radioactivity	29162613	Febvre-James, Marie, et al. "The JAK1/2 inhibitor ruxolitinib reverses interleukin-6-mediated suppression of drug-detoxifying proteins in cultured human hepatocytes." Drug Metabolism and Disposition 46.2 (2018): 131-140.
Ruxolitinib	Parent	Yes	~20% inhibition at 10uM			OATP1B1 in Flp-In T-Rex29	15	5	0.1mM [3H]estradiol-17b-D-glucuronide (E2G)	radioactivity	24398510	Hu, Shuiying, et al. "Inhibition of OATP1B1 by tyrosine kinase inhibitors: in vitro–in vivo correlations." British journal of cancer 110.4 (2014): 894-898..pdf
Sorafenib	Parent	yes	>75% at 10 uM on both			HEK293/OATP1B1	15		estradiol-17β-ᴅ-glucuronide, 8-(2-[fluoresceinyl]-aminoethylthio)-adenosine-3′,5′-cyclic monophosphate	radioactivity	29337310	Leblanc, Alix F., et al. "OATP1B2 deficiency protects against paclitaxel-induced neurotoxicity." The Journal of clinical investigation 128.2 (2018): 816-825.
Sorafenib	Parent	yes	>90% inhibition at 10 uM			Flp-In T-Rex293 cells transfected with OATP1B1*1A	15	5	[3H]estradiol-17b-D-glucuronide (E2G) (0.1 mM;	radioactivity		Hu, Shuiying, et al. "Inhibition of OATP1B1 by tyrosine kinase inhibitors: in vitro–in vivo correlations." British journal of cancer 110.4 (2014): 894-898.
Sorafenib	Parent	yes	50% inhibition at 69.6uM			Flp-In T-Rex293 cells transfected with OATP1B1*1A	15	5	[3H]docetaxel (0.1 mM)	radioactivity		Hu, Shuiying, et al. "Inhibition of OATP1B1 by tyrosine kinase inhibitors: in vitro–in vivo correlations." British journal of cancer 110.4 (2014): 894-898..pdf
Sorafenib	Parent	No				HEK/OATP1B1	10	2	FL (3 mM)	fluorescence		Koide, Hiroyoshi, et al. "Substrate-dependent effects of molecular-targeted anticancer agents on activity of organic anion transporting polypeptide 1B1." Xenobiotica 48.10 (2018): 1059-1071.
Sorafenib	Parent	No				HEK/OATP1B1	10	2	DCF (1 mM)	fluorescence		Koide, Hiroyoshi, et al. "Substrate-dependent effects of molecular-targeted anticancer agents on activity of organic anion transporting polypeptide 1B1." Xenobiotica 48.10 (2018): 1059-1071.
Sorafenib	Parent	No				HEK/OATP1B1	10	2	atorvastatin (0.5 mM)	fluorescence		Koide, Hiroyoshi, et al. "Substrate-dependent effects of molecular-targeted anticancer agents on activity of organic anion transporting polypeptide 1B1." Xenobiotica 48.10 (2018): 1059-1071.
Sorafenib	Parent	No				HEK/OATP1B1	10	0.5	SN-38 (1 mM)	fluorescence		Koide, Hiroyoshi, et al. "Substrate-dependent effects of molecular-targeted anticancer agents on activity of organic anion transporting polypeptide 1B1." Xenobiotica 48.10 (2018): 1059-1071.
Sorafenib	Parent	No				HEK/OATP1B1	10	0.5	valsartan (1 mM)	fluorescence		Koide, Hiroyoshi, et al. "Substrate-dependent effects of molecular-targeted anticancer agents on activity of organic anion transporting polypeptide 1B1." Xenobiotica 48.10 (2018): 1059-1071.
Sorafenib	Parent	No	96 ± 7% function remaining after incubation with 10uM	Yes	68 ± 0.5% function remaining after incubation with 10uM	HEK293/OATP1B1 or 3	None?	8	300nM E3S (1B1) or 2nM CCK-8 (1B3)	radioactivity	25165131	Johnston, Rosie A., et al. "Selective inhibition of human solute carrier transporters by multikinase inhibitors." Drug Metabolism and Disposition 42.11 (2014): 1851-1857.
Sorafenib	N-Hydroxymethylsorafenib N-oxide	Yes	64 ± 9% function remaining after incubation with 10uM	Yes	66 ± 4% function remaining after incubation with 10uM	HEK293/OATP1B1 or 3	None?	8	300nM E3S (1B1) or 2nM CCK-8 (1B3)	radioactivity	25165131	Johnston, Rosie A., et al. "Selective inhibition of human solute carrier transporters by multikinase inhibitors." Drug Metabolism and Disposition 42.11 (2014): 1851-1857.
Sorafenib	Sorafenib N-oxide	Yes	81 ± 1% function remaining after incubation with 10uM	No	80 ± 3% function remaining after incubation with 10uM	HEK293/OATP1B1 or 3	None?	8	300nM E3S (1B1) or 2nM CCK-8 (1B3)	radioactivity	25165131	Johnston, Rosie A., et al. "Selective inhibition of human solute carrier transporters by multikinase inhibitors." Drug Metabolism and Disposition 42.11 (2014): 1851-1857.
Sorafenib	N-Hydroxymethylsorafenib	No	101 ± 4% function remaining after incubation with 10uM	No	113 ± 8% function remaining after incubation with 10uM	HEK293/OATP1B1 or 3	None?	8	300nM E3S (1B1) or 2nM CCK-8 (1B3)	radioactivity	25165131	Johnston, Rosie A., et al. "Selective inhibition of human solute carrier transporters by multikinase inhibitors." Drug Metabolism and Disposition 42.11 (2014): 1851-1857.
Sorafenib	N-Desmethylsorafenib	Yes	68 ± 0.55% function remaining after incubation with 10uM	No	130 ± 9% function remaining after incubation with 10uM	HEK293/OATP1B1 or 3	None?	8	300nM E3S (1B1) or 2nM CCK-8 (1B3)	radioactivity	25165131	Johnston, Rosie A., et al. "Selective inhibition of human solute carrier transporters by multikinase inhibitors." Drug Metabolism and Disposition 42.11 (2014): 1851-1857.
Sorafenib	N-Desmethylsorafenib N-oxide	No	108 ± 2% function remaining after incubation with 10uM	No	96 ± 4% function remaining after incubation with 10uM	HEK293/OATP1B1 or 3	None?	8	300nM E3S (1B1) or 2nM CCK-8 (1B3)	radioactivity	25165131	Johnston, Rosie A., et al. "Selective inhibition of human solute carrier transporters by multikinase inhibitors." Drug Metabolism and Disposition 42.11 (2014): 1851-1857.
Sunitinib	Parent	yes	>25% decrease at 10 uM			Flp-In T-Rex293 cells transfected with OATP1B1*1A	15	5	[3H]estradiol-17b-D-glucuronide (E2G) (0.1 mM;	radioactivity		Hu, Shuiying, et al. "Inhibition of OATP1B1 by tyrosine kinase inhibitors: in vitro–in vivo correlations." British journal of cancer 110.4 (2014): 894-898.
Sunitinib	Parent	No	109 ± 10% function remaining after incubation with 10uM	No	101 ± 10% function remaining after incubation with 10uM	HEK293/OATP1B1 or 3	None?	8	300nM E3S (1B1) or 2nM CCK-8 (1B3)	radioactivity	25165131	Johnston, Rosie A., et al. "Selective inhibition of human solute carrier transporters by multikinase inhibitors." Drug Metabolism and Disposition 42.11 (2014): 1851-1857.
Sunitinib	Parent	yes	>25% inhibition			HEK293/OATP1B1	15		estradiol-17β-ᴅ-glucuronide, 8-(2-[fluoresceinyl]-aminoethylthio)-adenosine-3′,5′-cyclic monophosphate	radioactivity		Leblanc, Alix F., et al. "OATP1B2 deficiency protects against paclitaxel-induced neurotoxicity." The Journal of clinical investigation 128.2 (2018): 816-825.
Vandetanib	Parent	yes	>25% inhibition at 10 uM			Flp-In T-Rex293 cells transfected with OATP1B1*1A	15	5	[3H]estradiol-17b-D-glucuronide (E2G) (0.1 mM;	radioactivity		Hu, Shuiying, et al. "Inhibition of OATP1B1 by tyrosine kinase inhibitors: in vitro–in vivo correlations." British journal of cancer 110.4 (2014): 894-898.
Vandetanib	Parent	No		yes	50% inhibitionat 18.13 ± 1.21	OATP-1B1 and -1B3 transfected CHO cells		10	0.25 μCi/mL of [3H]ES (for OATP-1B1) or [3H]CCK-8 (for OATP-1B3)	radioactivity		Khurana, Varun, et al. "Inhibition of OATP-1B1 and OATP-1B3 by tyrosine kinase inhibitors." Drug Metabolism and Personalized Therapy 29.4 (2014): 249-259.
Vandetinib	Parent	No	110 ± 6% function remaining after incubation with 10uM	yes	71± 5% function remaining after incubation with 10uM	HEK293/OATP1B1 or 3	None?	8	300nM E3S (1B1) or 2nM CCK-8 (1B3)	radioactivity	25165131	Johnston, Rosie A., et al. "Selective inhibition of human solute carrier transporters by multikinase inhibitors." Drug Metabolism and Disposition 42.11 (2014): 1851-1857.
Vandetinib	Parent	yes	>25% inhibition at 10 uM			HEK293/OATP1B1	15		estradiol-17β-ᴅ-glucuronide, 8-(2-[fluoresceinyl]-aminoethylthio)-adenosine-3′,5′-cyclic monophosphate	radioactivity	29337310	Leblanc, Alix F., et al. "OATP1B2 deficiency protects against paclitaxel-induced neurotoxicity." The Journal of clinical investigation 128.2 (2018): 816-825.
Vemurafenib	Parent	yes	>70% inhibition at 10 uM			Flp-In T-Rex293 cells transfected with OATP1B1*1A	15	5	[3H]estradiol-17b-D-glucuronide (E2G) (0.1 mM;	radioactivity		Hu, Shuiying, et al. "Inhibition of OATP1B1 by tyrosine kinase inhibitors: in vitro–in vivo correlations." British journal of cancer 110.4 (2014): 894-898.
Vemurafenib	Parent	yes	>70% inhibition at 10 uM on both			HEK293/OATP1B1	15		estradiol-17β-ᴅ-glucuronide, 8-(2-[fluoresceinyl]-aminoethylthio)-adenosine-3′,5′-cyclic monophosphate	radioactivity	29337310	Leblanc, Alix F., et al. "OATP1B2 deficiency protects against paclitaxel-induced neurotoxicity." The Journal of clinical investigation 128.2 (2018): 816-825.

## Sheet: Table S6
Table S6. In vivo studies for TKIs as perptrators in OATP-mediated DDIs							Substrate
TKI	Site of Collection	OATP1B1/OATP1B3 inhibitor?	Dose (mg)	Schedule	Species/population	M/F	Dose (mg)	Schedule	Route	AUCt (μg·h/mL)	AUCinf (μg·h/mL)	Cmax (μg/mL)	T1/2 (h)	Tmax (min)	Notes	PMID (or DOI)	Reference Link
Imatinib	Portal Vein	No	No inhibitor		Pigs (Yorkshire and Swedish Landrace)	13 (castrated)/1	80mg	Rosuvastatin	i.j.	2.32 ± 0.60		1.43 ± 0.70	2.3 (0.9–3.8)	40 (20–80)	Also collected bile measurements	20583894	Bergman, Ebba, et al. "The effect of acute administration of rifampicin and imatinib on the enterohepatic transport of rosuvastatin in vivo." Xenobiotica 40.8 (2010): 558-568.
Imatinib	Portal Vein	No	14mg/kg	2-h CVC Infusion	Pigs (Yorkshire and Swedish Landrace)	13 (castrated)/1	80mg	Rosuvastatin	i.j.	2.62 ± 0.44		2.49 ± 0.43	1.9 (1.4–3.1)	20
Imatinib	Hepatic Vein	No	No inhibitor		Pigs (Yorkshire and Swedish Landrace)	13 (castrated)/1	80mg	Rosuvastatin	i.j.	0.47 ± 0.47		0.25 ± 0.21	1.3 (0.7–3.2)	40 (20–60)
Imatinib	Hepatic Vein	No	14mg/kg	2-h CVC Infusion	Pigs (Yorkshire and Swedish Landrace)	13 (castrated)/1	80mg	Rosuvastatin	i.j.	0.66 ± 0.37		0.71 ± 0.31	1.7 (0.8–2.7)	20
Lapatinib	livers	No	100 mg/kg/	Oral for 7 days	rats	5	0.025 mmol /kg	gadolinium							Relative enhancement of the liver was similar in both groups. At the hepatobiliary phase, which in rats occurs 3 min after the injection of Gd-EOB, it was 0.90 ± 0.06 in lapatinib-treated rats and 0.84 ± 0.08 in the controls (p = 0.30). In rats, the administration of lapatinib for 7 days had no effect on hepatic parenchymal enhancement on Gd-EOB-MRI scans.		Nakamura, Yuko, et al. "Effect of lapatinib on hepatic parenchymal enhancement on gadoxetate disodium (EOB)-enhanced MRI scans of the rat liver." Japanese journal of radiology 31.6 (2013): 386-392.

## Sheet: Table S7
Table S7. Literature on clinical studies focused on TKIs in potential DDIs
TKI	Notes	Reference Link
Fostamatinib	Report ~2-fold increase in Rosuvastatin and Simvastatin PK, but go to great lengths to argue this is through BCRP. Convoluted reporting of PK parameters	Martin, P., et al. "Effects of fostamatinib on the pharmacokinetics of oral contraceptive, warfarin, and the statins rosuvastatin and simvastatin: results from phase I clinical studies." Drugs in R&D 16.1 (2016): 93-107.
Osimertinib	Osimertinib is unlikely to have any clinically relevant interaction with CYP3A substrates and has a weak inhibitory effect on BCRP.	Harvey, R. Donald, et al. "Effect of multiple‐dose osimertinib on the pharmacokinetics of simvastatin and rosuvastatin." British journal of clinical pharmacology 84.12 (2018): 2877-2888.
Osimertinib	Clinically relevent interactions not observed with simvastatin	Vishwanathan, Karthick, et al. "Impact of Disease and Treatment Response in Drug–Drug Interaction Studies: Osimertinib and Simvastatin in Advanced Non‐Small Cell Lung Cancer." Clinical and Translational Science 13.1 (2020): 41-46.
Osimertinib	An increase in fexofenadine exposure was reported upon coadministration with both single and multiple doses of osimertinib with an increase in median fexofenadine tmax by approximately 30 minutes. The effect seen in this study for fexofenadine is consistent with that previously observed with verapamil and fexofenadine, where the changes in indices of exposure (Cmax, AUC) were consistent with inhi…	Calvo, Emiliano, et al. "Modulation of Fexofenadine Pharmacokinetics by Osimertinib in Patients With Advanced EGFR‐Mutated Non–Small Cell Lung Cancer." The Journal of Clinical Pharmacology 59.8 (2019): 1099-1109.
Osimertinib	OATP1B1 inhibition Ki (uM) 22, OATP1B1 inhibition Ki (uM) 52.5 was suggested from experimental data with no reference, and was used for PBPK modeling	Reddy, Venkatesh Pilla, et al. "Development, verification, and prediction of osimertinib drug–drug interactions using PBPK modeling approach to inform drug label." CPT: pharmacometrics & systems pharmacology 7.5 (2018): 321-330.
Lapatinib	Changes seen on hepatobiliary phase (HBP)- gadoxetate disodium (EOB)-enhanced magnetic resonance image of a woman with liver metastases who was treated with lapatinib was reported. After treatment, the HBP images appeared like portal venous phase images. This suggests that lapatinib, an inhibitor of organic anion transporting polypeptide 1B1, one of the substrates of EOB, inhibits EOB uptake by h…	Nakamura, Yuko, et al. "Effect of lapatinib on hepatic parenchymal enhancement on gadoxetate disodium (EOB)-enhanced MRI scans of the rat liver." Japanese journal of radiology 31.6 (2013): 386-392.
Nilotinib	An extremely low dose of repaglinide caused severe hypoglycemia . A 71-year-old man with type 2 diabetes was taken to the hospital due to consciousness disorder caused by severe hypoglycemia. He was taking repaglinide 0.25 mg once in the morning with nilotinib 400 mg/day and febuxostat 20 mg/day. Endogenous insulin secretion was not suppressed even in hypoglycemia. Detection of plasma repaglinide…	Komatsu, Hitomi, et al. "Severe hypoglycemia caused by a small dose of repaglinide and concurrent use of nilotinib and febuxostat in a patient with type 2 diabetes." Diabetology International (2020): 1-5.
Pazopanib	The poor metabolizer status for CYP2C8 coupled with potential inhibition of this enzyme and of OATP1B1 by pazopanib may explain the observed drug–drug interaction resulting in increased exposure to both simvastatin (4-fold) and simvastatin acid (10-fold) in this patient. Both pazopanib and simvastatin have been associated with transaminase elevations and may each have contributed to the observed …	Kendra, Kari L., et al. "A multicenter phase I study of pazopanib in combination with paclitaxel in first-line treatment of patients with advanced solid tumors." Molecular cancer therapeutics 14.2 (2015): 461-469.
Pazopanib	Severe hyperglycaemia developed in a patient one month following initiation of pazopanib therapy. As drug-drug-gene interactions may lead to hyperglycaemia, pharmacogenetic assessment was requested. The obtained findings indicated intermediate function of both OATP1B1 and P-glycoprotein transporters, which may cause prolonged pazopanib bioavailability and increased toxicity. Pazopanib was discont…	Božina, N., L. Šimičević, and I. Žabić. "Severe hyperglycaemia following pazopanib treatment: The role of drug-drug-gene interactions in a patient with metastatic renal cell carcinoma-A case report." Journal of Clinical Pharmacy and Therapeutics (2020).
Pazopanib	400 mg of pazopanib can be safely combined with docetaxel when given either at 50 mg/m2 D3w or 20 mg/m2 D1w. A significant effect of pazopanib on docetaxel exposure, as observed by a 34 % increase in AUC, was found. This effect is most likely based on CYP3A4 and OATP1B inhibition by pazopanib. However, at the recommended doses obtained from this study, the combination of pazopanib and docetaxel c…	Hamberg, Paul, et al. "Impact of pazopanib on docetaxel exposure: results of a phase I combination study with two different docetaxel schedules." Cancer chemotherapy and pharmacology 75.2 (2015): 365-371.
Pazopanib	This study showed that concomitant use of pazopanib and simvastatin increased the risk of transaminase elevations in patients with cancer. In addition to implementing the recommended dose modification guidelines for pazopanib, discontinuation of simvastatin should be considered to manage the risk of liver injury in cancer patients receiving both medications. Furthermore, hepatotoxicity/transamina…	Concomitant use of pazopanib and simvastatin increases the risk of transaminase elevations in patients with cancer

## Sheet: Table S8
Table S8. Comparison of the PI, FDA, and EMA guidance documents to the literature for OATP1B1 inhibition and OATP1B3 inhibition
	OATP1B1					OATP1B3
TKI	PI	FDA	EMA	Literature	TKI	PI	FDA	EMA	Literature
Acalabrutinib	No	No		No	Acalabrutinib	No	No		No
Afatinib			No	No	Afatinib			No	Yes
Axatinib				yes	Axatinib
Bosutinib	No	No		yes /No	Bosutinib	No	No		No
Cabozantib			No	Yes/No	Cabozantib			No	Yes/No
Ceritinib	No	Yes	No	Yes/No	Ceritinib	No	yes	No
Crizotinib	No	Yes		Yes/No	Crizotinib	No	yes
Crizotinib	No	Yes		Yes	Dabrafenib	Yes	Yes	Yes	No
Dabrafenib	Yes	Yes	Yes	Yes	Dasatinib				Yes
Dasatinib				Yes	Erlotinib				Yes
Erlotinib				Yes/No	Fostamatinib				No
Fostamatinib			No	No	Geftinib				Yes,
Geftinib				yes /No	Imatinib				Yes/No
Imatinib				yes /No	Lapatanib
Lapatanib	Yes	Yes	Yes	yes/No	Lenvatinib	No	No	No	No/yes, slight inhibition
Lenvatinib	No	Yes	Yes	Yes	Neratinib			No
Neratinib			No	No /Yes	Nilotinib				Yes/No
Nilotinib				Yes/No	Nintedanib	No	No	No	Yes/No
Nintedanib	No	No	No	Yes/No	Pazopanib				No
Pazopanib	Yes	Yes	Yes	Yes/No	Regorafenib		No
Regorafenib		No		Yes/No	Roxulotinib	No	No		no
Ruxolitinib	No	No		Yes/No	Sorafenib				Yes
Sorafenib				Yes/No	Sunitinib				No
Sunitinib				Yes/No	Vandetanib				No
Vandetanib				Yes/No	Vemurafenib				yes
Vemurafenib				yes

## Sheet: Table S9
Table S9. TKIs for which no relevant literature was found for OATP-mediated inhibition by TKIs
TKI
Alectinib
Avapritinib
Baracitinib
Binimetinib
Brigatinib
Cobimetinib
Dacomitbiitib
Encorafenib
Erdafitnib
Fedratinib
Gilteritinib
Ibrutinib
Laroctrectinib
Lorlatinib
Midostaurin
Pexidartinib
Ponatinib
Trametinib
Zanbrutinib

## Sheet: In Vitro (color coded by ref)
TKI	Parent/Metabolite	OATP1B1 Substrate?	OATP1B3 Substrate?	OATP1B1 inhibitor?	Reported values	OATP1B3 inhibitor?	Reported values	Model	Pre-Incubation (mins)	Incubation (mins)	Substrate	Method	Notes	PMID (or DOI)	Reference Link
Acalabrutinib	Parent			No		No								10.1158/1538-7445.AM2019-13	https://cancerres.aacrjournals.org/content/79/13_Supplement/13.short
Afatinib	Parent			No (inducer?)	250% stimulation at 30 uM			HEK/OATP1B1	10	2	FL (3 mM)	the fluorescenc			https://www.tandfonline.com/doi/abs/10.1080/00498254.2017.1393582?casa_token=xCb1eTyWh9cAAAAA:nLXT4BlWQR0gjQG9XjFQWAT8m3juSL3DQvYhXjN8_jnb3IukTeLSryRHDxyQRFSmqQ6XDjYKcy-j
Afatinib	Parent			No				HEK/OATP1B1	10	2	DCF (1 mM)	Absorbance	in the absence (Control) of rifampicin, presence of rifampicin (30 mM), or presence of molecular-targeted agents (30 mM)		https://www.tandfonline.com/doi/abs/10.1080/00498254.2017.1393582?casa_token=xCb1eTyWh9cAAAAA:nLXT4BlWQR0gjQG9XjFQWAT8m3juSL3DQvYhXjN8_jnb3IukTeLSryRHDxyQRFSmqQ6XDjYKcy-j
Afatinib	Parent			No				HEK/OATP1B1	10	2	atorvastatin (0.5 mM)	LCMS/MS	at 37_x0002_C for 2 min (FL, DCF, atorvastatin and valsartan) or 0.5 min (SN-38) after 10 min pre-incubation.		https://www.tandfonline.com/doi/abs/10.1080/00498254.2017.1393582?casa_token=xCb1eTyWh9cAAAAA:nLXT4BlWQR0gjQG9XjFQWAT8m3juSL3DQvYhXjN8_jnb3IukTeLSryRHDxyQRFSmqQ6XDjYKcy-j
Afatinib	Parent			No	150% stimulation at 30 uM			HEK/OATP1B1	10	0.5	SN-38 (1 mM)				https://www.tandfonline.com/doi/abs/10.1080/00498254.2017.1393582?casa_token=xCb1eTyWh9cAAAAA:nLXT4BlWQR0gjQG9XjFQWAT8m3juSL3DQvYhXjN8_jnb3IukTeLSryRHDxyQRFSmqQ6XDjYKcy-j
Afatinib	Parent			No				HEK/OATP1B1	10	0.5	valsartan (1 mM)				https://www.tandfonline.com/doi/abs/10.1080/00498254.2017.1393582?casa_token=xCb1eTyWh9cAAAAA:nLXT4BlWQR0gjQG9XjFQWAT8m3juSL3DQvYhXjN8_jnb3IukTeLSryRHDxyQRFSmqQ6XDjYKcy-j
Afatinib	Parent	No, 119 ± 4% function remaining after incubation with 10uM	Yes, 66 ± 3% function remaining after incubation with 10uM	No	119 ± 4% stimulation at 10 uM	Yes	66 ± 3% function remaining after incubation with 10uM	HEK293/OATP1B1 or 3	None?	8	300nM E3S (1B1) or 2nM CCK-8 (1B3)	radioactivity	Tested TKI at 10uM, if it was an inhibitor they determined the IC50	25165131	http://dmd.aspetjournals.org/content/42/11/1851.long
Axatinib	Parent			yes	>90% inhibition at 10 uM			Flp-In T-Rex293 cells transfected with OATP1B1*1A	15 min	5	[3H]estradiol-17b-D-glucuronide (E2G) (0.1 mM;	radioactivity	Influence of 16 different TKIs (10 mM; 15-min pre-incubation) on the activity of OATP1B1, expressed in Flp-In T-Rex293 cells, as determined by the intracellular accumulation of [3H]estradiol-17b-D-glucuronide (E2G) (0.1 mM; 5-min incubation).		https://www.nature.com/articles/bjc2013811
Axatinib	Parent			yes	>90% inhibition on 10 uM of E2G, >70% inhibtion on 8Fc-A			HEK293/OATP1B1	15 min		estradiol-17β-ᴅ-glucuronide, 8-(2-[fluoresceinyl]-aminoethylthio)-adenosine-3′,5′-cyclic monophosphate	radioactivity		29337310	https://www.ncbi.nlm.nih.gov/pmc/articles/PMC5785270/pdf/jci-128-96160.pdf
Bosutinib	Parent			yes	>60% inhibition at 10 uM			Flp-In T-Rex293 cells transfected with OATP1B1*1A	15 min	5	[3H]estradiol-17b-D-glucuronide (E2G) (0.1 mM;	radioactivity			https://www.nature.com/articles/bjc2013811
Bosutinib	Parent	No, 121 ± 6% function remaining after incubation with 10uM	No, 109 ± 5% function remaining after incubation with 10uM	No	121 ± 6% stimulationin at 10uM	No	109 ± 5% function remaining after incubation with 10uM	HEK293/OATP1B1 or 3	None?	8	300nM E3S (1B1) or 2nM CCK-8 (1B3)	radioactivity		25165131	http://dmd.aspetjournals.org/content/42/11/1851.long
Bosutinib	Parent			yes	>25% 10 uM on E2G, >50% on 8Fc-A			HEK293/OATP1B1	15 min		estradiol-17β-ᴅ-glucuronide, 8-(2-[fluoresceinyl]-aminoethylthio)-adenosine-3′,5′-cyclic monophosphate	radioactivity		29337310	https://www.ncbi.nlm.nih.gov/pmc/articles/PMC5785270/pdf/jci-128-96160.pdf
Cabozantib	EXEL-1644	Yes	Yes	Yes	50% inhibition at 6.1 uM	Yes	20.6 uM	MDCK-II cell monolayers	Unclear.	Unclear incubation times. 5 minutes on a shaker?	OATP1B1: 2mM 3H-estradiol-17b-D-glucuronide; OATP1B3: 2mM3H-cholecystokinin-8	Radioactivity		26015560	http://dmd.aspetjournals.org/content/dmd/43/8/1190.full.pdf
Cabozantib	Parent	No	No	No (>15uM)		No (>10uM)		MDCK-II cell monolayers	Unclear.	Unclear.	OATP1B1 0.5mM3H-estradiol-17b-D-glucuronide; OATP1B3: 1mM3H-cholecystokininoctapeptide	Radioactivity	Unclear why substrate concentrations are different	26015560	http://dmd.aspetjournals.org/content/dmd/43/8/1190.full.pdf
Cabozantib	Parent			Yes	59% inhibition at 30 uM			HEK/OATP1B1		2	3uM fluorescein (FL)	Absorbance		29034773	https://www.tandfonline.com/doi/abs/10.1080/00498254.2017.1393582?casa_token=xCb1eTyWh9cAAAAA:nLXT4BlWQR0gjQG9XjFQWAT8m3juSL3DQvYhXjN8_jnb3IukTeLSryRHDxyQRFSmqQ6XDjYKcy-j
Cabozantib	Parent			Yes	61% inhibition at 30 uM			HEK/OATP1B1		2	1uM 2′,7′-dichlorofluorescein (DCF)	Absorbance		29034773	https://www.tandfonline.com/doi/abs/10.1080/00498254.2017.1393582?casa_token=xCb1eTyWh9cAAAAA:nLXT4BlWQR0gjQG9XjFQWAT8m3juSL3DQvYhXjN8_jnb3IukTeLSryRHDxyQRFSmqQ6XDjYKcy-j
Cabozantib	Parent			Yes	74% inhibition at 30 uM			HEK/OATP1B1		2	1uM Valsartan	LCMS/MS		29034773	https://www.tandfonline.com/doi/abs/10.1080/00498254.2017.1393582?casa_token=xCb1eTyWh9cAAAAA:nLXT4BlWQR0gjQG9XjFQWAT8m3juSL3DQvYhXjN8_jnb3IukTeLSryRHDxyQRFSmqQ6XDjYKcy-j
Ceritinib	Parent			Yes	50% inhibition at 30 uM			HEK/OATP1B1	10	2	FL (3 mM)	fluorescence			https://www.tandfonline.com/doi/abs/10.1080/00498254.2017.1393582?casa_token=xCb1eTyWh9cAAAAA:nLXT4BlWQR0gjQG9XjFQWAT8m3juSL3DQvYhXjN8_jnb3IukTeLSryRHDxyQRFSmqQ6XDjYKcy-j
Ceritinib	Parent			Yes	50% inhibition at 30 uM			HEK/OATP1B1	10	2	DCF (1 mM)	fluorescence			https://www.tandfonline.com/doi/abs/10.1080/00498254.2017.1393582?casa_token=xCb1eTyWh9cAAAAA:nLXT4BlWQR0gjQG9XjFQWAT8m3juSL3DQvYhXjN8_jnb3IukTeLSryRHDxyQRFSmqQ6XDjYKcy-j
Ceritinib	Parent			Yes	50% inhibition at 30 uM			HEK/OATP1B1	10	2	atorvastatin (0.5 mM)	fluorescence			https://www.tandfonline.com/doi/abs/10.1080/00498254.2017.1393582?casa_token=xCb1eTyWh9cAAAAA:nLXT4BlWQR0gjQG9XjFQWAT8m3juSL3DQvYhXjN8_jnb3IukTeLSryRHDxyQRFSmqQ6XDjYKcy-j
Ceritinib	Parent			Yes	50% inhibition at 30uM			HEK/OATP1B1	10	0.5	SN-38 (1 mM)	fluorescence			https://www.tandfonline.com/doi/abs/10.1080/00498254.2017.1393582?casa_token=xCb1eTyWh9cAAAAA:nLXT4BlWQR0gjQG9XjFQWAT8m3juSL3DQvYhXjN8_jnb3IukTeLSryRHDxyQRFSmqQ6XDjYKcy-j
Ceritinib	Parent			No (inducer?)	150% stimulation at 30uM			HEK/OATP1B1	10	0.5	valsartan (1 mM)	fluorescence			https://www.tandfonline.com/doi/abs/10.1080/00498254.2017.1393582?casa_token=xCb1eTyWh9cAAAAA:nLXT4BlWQR0gjQG9XjFQWAT8m3juSL3DQvYhXjN8_jnb3IukTeLSryRHDxyQRFSmqQ6XDjYKcy-j
Crizotinib	Parent	Yes	Yes	No		No		HEK/OATP1B1 or 1B3		See Substrate	11nM [3H]E3S for 15 seconds (1B1) 50nM [3H]TCA for 2 minutes (1B3) 0.5 uM fluvastatin (5 minutes; 1B1) 2 uM fluvastatin (5 minutes; 1B1)	Radioactivity		28005438	https://www.tandfonline.com/doi/abs/10.1080/00498254.2016.1275880?journalCode=ixen20
Crizotinib	Parent			Yes	>25% inhibition at 10 uM			HEK293/OATP1B1	15 min		estradiol-17β-ᴅ-glucuronide, 8-(2-[fluoresceinyl]-aminoethylthio)-adenosine-3′,5′-cyclic monophosphate	radioactivity		29337310	https://www.ncbi.nlm.nih.gov/pmc/articles/PMC5785270/pdf/jci-128-96160.pdf
Dabrafenib	Parent			Yes	50% inhibition at 1.4 uM	Yes	IC50:4.7	CHO-OATP1B1 or HEK-MSRII cells, transduced with BacMam baculovirus containing human OATP1B1 or OATP1B3	15 to 30 minutes	5 minutes for CHO-OATP1B1 cells, 3 minutes for HEK-OATP1B1 cells, and 10 minutes for HEK-OATP1B3 cells	0.02 mM [3H]EG	LC/MS/MS.	Cell monolayers were preincubated in triplicate (37 C) for 15 to 30 minutes in 1 ml transport medium (DPBS) in the absence or presence of increasing concentrations of dabrafenib or its metabolites (range: 0.01–100 mM, respectively) or the positive control inhibitor rifamycin (10 mM). After removal of preincubation media, cells were incubated at 37 C with the positive control substrate [3H]EG (0.0…		http://dmd.aspetjournals.org/content/45/6/646.abstract
Dabrafenib	Hydroxy-Dabrafenib			Yes, IC50: 4.3		Yes, IC50:23		CHO-OATP1B1 or HEK-MSRII cells, transduced with BacMam baculovirus containing human OATP1B1 or OATP1B3	15 to 30 minutes	5 minutes for CHO-OATP1B1 cells, 3 minutes for HEK-OATP1B1 cells, and 10 minutes for HEK-OATP1B3 cells	0.02 mM [3H]EG	LC/MS/MS.			http://dmd.aspetjournals.org/content/45/6/646.abstract
Dabrafenib	Carboxy-Dabrafenib			Yes, IC50: 18		Yes, IC50: 20		CHO-OATP1B1 or HEK-MSRII cells, transduced with BacMam baculovirus containing human OATP1B1 or OATP1B3	15 to 30 minutes	5 minutes for CHO-OATP1B1 cells, 3 minutes for HEK-OATP1B1 cells, and 10 minutes for HEK-OATP1B3 cells	0.02 mM [3H]EG	LC/MS/MS.			http://dmd.aspetjournals.org/content/45/6/646.abstract
Dabrafenib	Desmethyl-Dabrafenib			Yes	50% inhibition at 0.83 uM	Yes	IC50: 4.3	CHO-OATP1B1 or HEK-MSRII cells, transduced with BacMam baculovirus containing human OATP1B1 or OATP1B3	15 to 30 minutes	5 minutes for CHO-OATP1B1 cells, 3 minutes for HEK-OATP1B1 cells, and 10 minutes for HEK-OATP1B3 cells	0.02 mM [3H]EG	LC/MS/MS.			http://dmd.aspetjournals.org/content/45/6/646.abstract
Dasatinib	Parent			Yes	50% inhibition at 4.81 ± 1.7 uM (no pretreatment) 50% inhibition at 2.33 ± 0.86 uM (pre-treatment)	Yes	5.76 ± 1.1 uM (no pretreatment) 2.75 ± 1.17 uM (pre-treatment	HEK/OATP1B1 or 1B3	2 min	2	[3H]-E217βG (1 μM, 2 min) (pre- and co-)	Radioactivity	Also did modeling to suggest dasatinib has low interaction potential with pravastatin	28373111	https://jpharmsci.org/article/S0022-3549(17)30208-3/fulltext
Dasatinib	Parent			yes	>50% inhibition at 10 uM			HEK293/OATP1B1	15 min		estradiol-17β-ᴅ-glucuronide, 8-(2-[fluoresceinyl]-aminoethylthio)-adenosine-3′,5′-cyclic monophosphate	radioactivity		29337310	https://www.ncbi.nlm.nih.gov/pmc/articles/PMC5785270/pdf/jci-128-96160.pdf
Dasatinib	Parent			yes	~65% inhibition at 10uM			OATP1B1 in Flp-In T-Rex29	15	5	0.1uM estradiol-17b-D-glucuronide	Radioactivity		24398510	https://www.ncbi.nlm.nih.gov/pmc/articles/PMC3929889/pdf/bjc2013811a.pdf
Erlotinib	Parent			No		No		OATP-1B1 and -1B3 transfected CHO cells		10	0.25 μCi/mL of [3H]ES (for OATP-1B1) or [3H]CCK-8 (for OATP-1B3)	radioactivity	[3H]ES and [3H]CCK-8 were employed as radiolabeled probe substrates for OATP-1B1 and -1B3 transporter proteins, respectively. Cellular accumulation of [3H]ES was measured by exposing OATP-1B1 transfected CHO cells to two different concentrations (25 and 50 μM) of TKIs and rifampicin (positive control).	https://doi.org/10.1515/dmdi-2014-0014	https://www.degruyter.com/view/j/dmdi.2014.29.issue-4/dmdi-2014-0014/dmdi-2014-0014.xml
Erlotinib	Parent			yes	>60% decrease at 10 uM			Flp-In T-Rex293 cells transfected with OATP1B1*1A	15	5	[3H]estradiol-17b-D-glucuronide (E2G) (0.1 mM;	radioactivity			https://www.nature.com/articles/bjc2013811
Erlotinib	Parent	No, 104 ± 5% function remaining after incubation with 10uM	Yes, 1.19uM IC50 value	No	104 ± 5% function remaining after incubation with 10uM	Yes,	IC50: 1.19uM	HEK293/OATP1B1 or 3	None?	8	300nM E3S (1B1) or 2nM CCK-8 (1B3)	radioactivity		25165131	http://dmd.aspetjournals.org/content/42/11/1851.long
Erlotinib	Parent			yes	>25% inhibtion at 10 uM on E2G, >50% inhibition on 8Fc-A			HEK293/OATP1B1	15		estradiol-17β-ᴅ-glucuronide, 8-(2-[fluoresceinyl]-aminoethylthio)-adenosine-3′,5′-cyclic monophosphate	radioactivity		29337310	https://www.ncbi.nlm.nih.gov/pmc/articles/PMC5785270/pdf/jci-128-96160.pdf
Fostamatinib	Parent			No	>10 uM				15	2	[3H]estradiol glucuronide (0.02mM)	Radioactivity		26700956	http://dmd.aspetjournals.org/content/44/3/398.long
Geftinib	Parent			yes	>70% decrease with 10 uM			Flp-In T-Rex293 cells transfected with OATP1B1*1A	15	5	[3H]estradiol-17b-D-glucuronide (E2G) (0.1 mM;	radioactivity			https://www.nature.com/articles/bjc2013811
Geftinib	Parent			yes	50% inhibition at 17.2±1.47 uM,	yes	18.8± 2.74 mM	Human embryonic kidney (HEK293) cells transduced with OATP1B1, OATP1B3,			fluvastatin	LC/MS/MS			https://www.tandfonline.com/doi/abs/10.1080/00498254.2016.1275880?casa_token=vLVhXdAWOksAAAAA:2WttALhU6B0nTDVDUq_H76rGdC3HiGvn1_4daB1VefI7iCpYPA1TNSMyabPTWwVF2txiLCWtjWF3yA
Geftinib	Parent					no (inducer?)	EC50 value of 14.1±4.6 mM	Human embryonic kidney (HEK293) cells transduced with OATP1B1, OATP1B3,			[3H]TCA	LC/MS/MS			https://www.tandfonline.com/doi/abs/10.1080/00498254.2016.1275880?casa_token=vLVhXdAWOksAAAAA:2WttALhU6B0nTDVDUq_H76rGdC3HiGvn1_4daB1VefI7iCpYPA1TNSMyabPTWwVF2txiLCWtjWF3yA
Geftinib	Parent	No, 105 ± 3% function remaining after incubation with 10uM	No, 78 ± 3% function remaining after incubation with 10uM	No	105 ± 3% stimulation at 10uM	No	78 ± 3% function remaining after incubation with 10uM	HEK293/OATP1B1 or 3	None?	8	300nM E3S (1B1) or 2nM CCK-8 (1B3)	radioactivity		25165131	http://dmd.aspetjournals.org/content/42/11/1851.long
Geftinib	Parent			yes	>25% inhibition at 10 uM on E2G, >75% inhibition on 8Fc-A			HEK293/OATP1B1	15		estradiol-17β-ᴅ-glucuronide, 8-(2-[fluoresceinyl]-aminoethylthio)-adenosine-3′,5′-cyclic monophosphate	radioactivity		29337310	https://www.ncbi.nlm.nih.gov/pmc/articles/PMC5785270/pdf/jci-128-96160.pdf
Imatinib	Parent			yes	~20% inhibition at 10uM			OATP1B1 in Flp-In T-Rex29	15	5	0.1mM [3H]estradiol-17b-D-glucuronide (E2G)	Radioactivity		24398510	https://www.nature.com/articles/bjc2013811.pdf
Imatinib	Parent			No				OATP-transduced Sf9 cells	5	10	1uM Na-Fluo	Absorbance		26415544	https://www.ncbi.nlm.nih.gov/pmc/articles/PMC4959548/
Imatinib	Parent			yes	>25% inhibition at 10 uM on both			HEK293/OATP1B1	15		estradiol-17β-ᴅ-glucuronide, 8-(2-[fluoresceinyl]-aminoethylthio)-adenosine-3′,5′-cyclic monophosphate	radioactivity		29337310	https://www.ncbi.nlm.nih.gov/pmc/articles/PMC5785270/pdf/jci-128-96160.pdf
Lapatanib	Parent			yes	>70% inhibtion at 10 uM			HEK293/OATP1B1	15		estradiol-17β-ᴅ-glucuronide, 8-(2-[fluoresceinyl]-aminoethylthio)-adenosine-3′,5′-cyclic monophosphate	radioactivity		29337310	https://www.ncbi.nlm.nih.gov/pmc/articles/PMC5785270/pdf/jci-128-96160.pdf
Lapatanib	Parent			yes	>70% inhibtion at 10 uM			OATP1B1 in Flp-In T-Rex29	15	5	0.1mM [3H]estradiol-17b-D-glucuronide (E2G)	Radioactivity		24398510	https://www.nature.com/articles/bjc2013811.pdf
Lapatanib	Parent			no		yes, slight inhibition		OATP-1B1 and -1B3 transfected CHO cells		10	fluro-methotrexate	fluoresence	Concluded that the consensus model used was able to correctly predict OATP1B1, but not OATP1B3	26469880	https://www.ncbi.nlm.nih.gov/pmc/articles/PMC4674819/
Lapatanib	Parent			yes	50% inhibition at 4.0 uM (Sd:2.1)			CHO-OATP1B1	15-30	5	3H Estradiol 17 -D-glucuronide	radioactivity			https://pubmed.ncbi.nlm.nih.gov/18216274/
Lapatanib	Parent			No	123 ± 13% stimulation at 10uM	No	98 ± 16% function remaining after incubation with 10uM	HEK293/OATP1B1 or 3	None?	8	300nM E3S (1B1) or 2nM CCK-8 (1B3)	radioactivity		25165131	http://dmd.aspetjournals.org/content/42/11/1851.long
Lenvatinib	Parent			Yes	70% inhibition at 30uM			HEK/OATP1B1	10	2	FL (3 mM)	the fluorescence			https://www.tandfonline.com/doi/abs/10.1080/00498254.2017.1393582?casa_token=xCb1eTyWh9cAAAAA:nLXT4BlWQR0gjQG9XjFQWAT8m3juSL3DQvYhXjN8_jnb3IukTeLSryRHDxyQRFSmqQ6XDjYKcy-j
Lenvatinib	Parent			Yes	70% inhibition at 30uM			HEK/OATP1B1	10	2	DCF (1 mM)	the fluorescence			https://www.tandfonline.com/doi/abs/10.1080/00498254.2017.1393582?casa_token=xCb1eTyWh9cAAAAA:nLXT4BlWQR0gjQG9XjFQWAT8m3juSL3DQvYhXjN8_jnb3IukTeLSryRHDxyQRFSmqQ6XDjYKcy-j
Lenvatinib	Parent			Yes	70% inhibition at 30uM			HEK/OATP1B1	10	2	atorvastatin (0.5 mM)	the fluorescence			https://www.tandfonline.com/doi/abs/10.1080/00498254.2017.1393582?casa_token=xCb1eTyWh9cAAAAA:nLXT4BlWQR0gjQG9XjFQWAT8m3juSL3DQvYhXjN8_jnb3IukTeLSryRHDxyQRFSmqQ6XDjYKcy-j
Lenvatinib	Parent			Yes	70% inhibition at 30uM			HEK/OATP1B1	10	0.5	SN-38 (1 mM)	the fluorescence			https://www.tandfonline.com/doi/abs/10.1080/00498254.2017.1393582?casa_token=xCb1eTyWh9cAAAAA:nLXT4BlWQR0gjQG9XjFQWAT8m3juSL3DQvYhXjN8_jnb3IukTeLSryRHDxyQRFSmqQ6XDjYKcy-j
Lenvatinib	Parent			Yes	70% inhibition at 30uM			HEK/OATP1B1	10	0.5	valsartan (1 mM)	the fluorescence			https://www.tandfonline.com/doi/abs/10.1080/00498254.2017.1393582?casa_token=xCb1eTyWh9cAAAAA:nLXT4BlWQR0gjQG9XjFQWAT8m3juSL3DQvYhXjN8_jnb3IukTeLSryRHDxyQRFSmqQ6XDjYKcy-j
Neratinib	Parent			No				HEK/OATP1B1	10	2	FL (3 mM)	the fluorescence			https://www.tandfonline.com/doi/abs/10.1080/00498254.2017.1393582?casa_token=xCb1eTyWh9cAAAAA:nLXT4BlWQR0gjQG9XjFQWAT8m3juSL3DQvYhXjN8_jnb3IukTeLSryRHDxyQRFSmqQ6XDjYKcy-j
Neratinib	Parent			No				HEK/OATP1B1	10	2	DCF (1 mM)	the fluorescence			https://www.tandfonline.com/doi/abs/10.1080/00498254.2017.1393582?casa_token=xCb1eTyWh9cAAAAA:nLXT4BlWQR0gjQG9XjFQWAT8m3juSL3DQvYhXjN8_jnb3IukTeLSryRHDxyQRFSmqQ6XDjYKcy-j
Neratinib	Parent			No				HEK/OATP1B1	10	2	atorvastatin (0.5 mM)	the fluorescence			https://www.tandfonline.com/doi/abs/10.1080/00498254.2017.1393582?casa_token=xCb1eTyWh9cAAAAA:nLXT4BlWQR0gjQG9XjFQWAT8m3juSL3DQvYhXjN8_jnb3IukTeLSryRHDxyQRFSmqQ6XDjYKcy-j
Neratinib	Parent			Yes	30% inhibition at 30uM			HEK/OATP1B1	10	0.5	SN-38 (1 mM)	the fluorescence			https://www.tandfonline.com/doi/abs/10.1080/00498254.2017.1393582?casa_token=xCb1eTyWh9cAAAAA:nLXT4BlWQR0gjQG9XjFQWAT8m3juSL3DQvYhXjN8_jnb3IukTeLSryRHDxyQRFSmqQ6XDjYKcy-j
Neratinib	Parent			No				HEK/OATP1B1	10	0.5	valsartan (1 mM)	the fluorescence			https://www.tandfonline.com/doi/abs/10.1080/00498254.2017.1393582?casa_token=xCb1eTyWh9cAAAAA:nLXT4BlWQR0gjQG9XjFQWAT8m3juSL3DQvYhXjN8_jnb3IukTeLSryRHDxyQRFSmqQ6XDjYKcy-j
Neratinib	Parent	No, 110 ± 10% function remaining after incubation with 10uM	Yes, 0.65uM IC50 value	No	110 ± 10% stimulation at 10uM	Yes	IC50: 0.65uM	HEK293/OATP1B1 or 3	None?	8	300nM E3S (1B1) or 2nM CCK-8 (1B3)	radioactivity		25165131	http://dmd.aspetjournals.org/content/42/11/1851.long
Nilotinib	Parent			No				HEK/OATP1B1	10	2	FL (3 mM)	the fluorescence			https://www.tandfonline.com/doi/abs/10.1080/00498254.2017.1393582?casa_token=xCb1eTyWh9cAAAAA:nLXT4BlWQR0gjQG9XjFQWAT8m3juSL3DQvYhXjN8_jnb3IukTeLSryRHDxyQRFSmqQ6XDjYKcy-j
Nilotinib	Parent			Yes	~50% inhibition at 30uM			HEK/OATP1B1	10	2	DCF (1 mM)	the fluorescence			https://www.tandfonline.com/doi/abs/10.1080/00498254.2017.1393582?casa_token=xCb1eTyWh9cAAAAA:nLXT4BlWQR0gjQG9XjFQWAT8m3juSL3DQvYhXjN8_jnb3IukTeLSryRHDxyQRFSmqQ6XDjYKcy-j
Nilotinib	Parent			Yes	~50% inhibition at 30uM			HEK/OATP1B1	10	2	atorvastatin (0.5 mM)	the fluorescence			https://www.tandfonline.com/doi/abs/10.1080/00498254.2017.1393582?casa_token=xCb1eTyWh9cAAAAA:nLXT4BlWQR0gjQG9XjFQWAT8m3juSL3DQvYhXjN8_jnb3IukTeLSryRHDxyQRFSmqQ6XDjYKcy-j
Nilotinib	Parent			Yes	~50% inhibition at 30uM			HEK/OATP1B1	10	0.5	SN-38 (1 mM)	the fluorescence			https://www.tandfonline.com/doi/abs/10.1080/00498254.2017.1393582?casa_token=xCb1eTyWh9cAAAAA:nLXT4BlWQR0gjQG9XjFQWAT8m3juSL3DQvYhXjN8_jnb3IukTeLSryRHDxyQRFSmqQ6XDjYKcy-j
Nilotinib	Parent			Yes	~50% inhibition at 30uM			HEK/OATP1B1	10	0.5	valsartan (1 mM)	the fluorescence			https://www.tandfonline.com/doi/abs/10.1080/00498254.2017.1393582?casa_token=xCb1eTyWh9cAAAAA:nLXT4BlWQR0gjQG9XjFQWAT8m3juSL3DQvYhXjN8_jnb3IukTeLSryRHDxyQRFSmqQ6XDjYKcy-j
Nilotinib	Parent			yes	>95% inhibition at 10 uM			OATP1B1 in Flp-In T-Rex29	10	5	0.1mM [3H]estradiol-17b-D-glucuronide (E2G)	Radioactivity		24398510	https://www.nature.com/articles/bjc2013811.pdf
Nilotinib	Parent			No	110 ± 7% stimulation at 10uM	No	100 ± 3% function remaining after incubation with 10uM	HEK293/OATP1B1 or 3	None?	8	300nM E3S (1B1) or 2nM CCK-8 (1B3)	radioactivity		25165131	http://dmd.aspetjournals.org/content/42/11/1851.long
Nilotinib	Parent			yes	>80% inhibtion at 0-20uM			HEK/OATP1B1			8‐[2‐ [Fluoresceinyl]‐aminoethylthio)‐adenosine‐3′,5′‐cyclic‐monophosphate (5–40 μM) or estradiol‐b‐glucuronide (2 μM)		Abstract, Other TKIs are not reported in the abstract, HEK293 cells transfected with either OATP1B1, tyrosine to phenylalanine mutant variations of OATP1B1, were used	https://doi.org/10.1096/fasebj.2020.34.s1.05391	https://faseb.onlinelibrary.wiley.com/doi/abs/10.1096/fasebj.2020.34.s1.05391
Nilotinib	Parent			Yes	50% inhibition at 1.3μM	Yes		HEK293/OATP1B1 or 3			Estradiol-β-glucuronide or 8-(2-[Fluoresceinyl]-aminoethylthio)-adenosine-3′,5′-cyclicmonophosphate (8FcA),		Abstract, Other TKIs are not reported in the abstract, HEK293 cells transfected with either OATP1B1, tyrosine to phenylalanine mutant variations of OATP1B1, OATP1B3 were used		https://www.fasebj.org/doi/abs/10.1096/fasebj.2019.33.1_supplement.507.6
Nilotinib	Parent			yes	>50% at 10 uM, IC50: ~1 μM			HEK293/OATP1B1	15	15	estradiol-17β-ᴅ-glucuronide, 8-(2-[fluoresceinyl]-aminoethylthio)-adenosine-3′,5′-cyclic monophosphate	radioactivity		29337310	https://www.ncbi.nlm.nih.gov/pmc/articles/PMC5785270/pdf/jci-128-96160.pdf
Nilotinib	Parent			yes	50% inhibition at 2.78 ± 1.13 μM	No		Human OATP-1B1 and -1B3 transfected CHO cells		10	0.25 μCi/mL of [3H]ES (for OATP-1B1) or [3H]CCK-8 (for OATP-1B3)			https://doi.org/10.1515/dmdi-2014-0014	https://www.degruyter.com/view/j/dmdi.2014.29.issue-4/dmdi-2014-0014/dmdi-2014-0014.xml
Nintedanib	Parent			No	312% stimulation at 30uM			HEK/OATP1B1		2	3uM fluorescein (FL)	Absorbance		29034773	https://www.tandfonline.com/doi/abs/10.1080/00498254.2017.1393582?casa_token=xCb1eTyWh9cAAAAA:nLXT4BlWQR0gjQG9XjFQWAT8m3juSL3DQvYhXjN8_jnb3IukTeLSryRHDxyQRFSmqQ6XDjYKcy-j
Nintedanib	Parent			Yes	74% inhibition at 30uM			HEK/OATP1B1		2	1uM 2′,7′-dichlorofluorescein (DCF)	Absorbance		29034773	https://www.tandfonline.com/doi/abs/10.1080/00498254.2017.1393582?casa_token=xCb1eTyWh9cAAAAA:nLXT4BlWQR0gjQG9XjFQWAT8m3juSL3DQvYhXjN8_jnb3IukTeLSryRHDxyQRFSmqQ6XDjYKcy-j
Nintedanib	Parent			No	133% stimulation at 30uM			HEK/OATP1B1		2	1uM Valsartan	Absorbance		29034773	https://www.tandfonline.com/doi/abs/10.1080/00498254.2017.1393582?casa_token=xCb1eTyWh9cAAAAA:nLXT4BlWQR0gjQG9XjFQWAT8m3juSL3DQvYhXjN8_jnb3IukTeLSryRHDxyQRFSmqQ6XDjYKcy-j
Nintedanib	Parent			Yes	78% inhibition at 30uM			HEK/OATP1B1		2	1 μM SN-38	Absorbance		29034773	https://www.tandfonline.com/doi/abs/10.1080/00498254.2017.1393582?casa_token=xCb1eTyWh9cAAAAA:nLXT4BlWQR0gjQG9XjFQWAT8m3juSL3DQvYhXjN8_jnb3IukTeLSryRHDxyQRFSmqQ6XDjYKcy-j
Pazopanib	Parent			No	120% stimulation at 30uM			HEK/OATP1B1	10	2	FL (3 mM)	Absorbance			https://www.tandfonline.com/doi/abs/10.1080/00498254.2017.1393582?casa_token=xCb1eTyWh9cAAAAA:nLXT4BlWQR0gjQG9XjFQWAT8m3juSL3DQvYhXjN8_jnb3IukTeLSryRHDxyQRFSmqQ6XDjYKcy-j
Pazopanib	Parent			No				HEK/OATP1B1	10	2	DCF (1 mM)	Absorbance			https://www.tandfonline.com/doi/abs/10.1080/00498254.2017.1393582?casa_token=xCb1eTyWh9cAAAAA:nLXT4BlWQR0gjQG9XjFQWAT8m3juSL3DQvYhXjN8_jnb3IukTeLSryRHDxyQRFSmqQ6XDjYKcy-j
Pazopanib	Parent			No				HEK/OATP1B1	10	2	atorvastatin (0.5 mM)	Absorbance			https://www.tandfonline.com/doi/abs/10.1080/00498254.2017.1393582?casa_token=xCb1eTyWh9cAAAAA:nLXT4BlWQR0gjQG9XjFQWAT8m3juSL3DQvYhXjN8_jnb3IukTeLSryRHDxyQRFSmqQ6XDjYKcy-j
Pazopanib	Parent			No				HEK/OATP1B1	10	0.5	SN-38 (1 mM)	Absorbance			https://www.tandfonline.com/doi/abs/10.1080/00498254.2017.1393582?casa_token=xCb1eTyWh9cAAAAA:nLXT4BlWQR0gjQG9XjFQWAT8m3juSL3DQvYhXjN8_jnb3IukTeLSryRHDxyQRFSmqQ6XDjYKcy-j
Pazopanib	Parent			No				HEK/OATP1B1	10	0.5	valsartan (1 mM)	Absorbance			https://www.tandfonline.com/doi/abs/10.1080/00498254.2017.1393582?casa_token=xCb1eTyWh9cAAAAA:nLXT4BlWQR0gjQG9XjFQWAT8m3juSL3DQvYhXjN8_jnb3IukTeLSryRHDxyQRFSmqQ6XDjYKcy-j
Pazopanib	Parent			yes	50% inhibition 3.89 ± 1.21 μM	No		Human OATP-1B1 and -1B3 transfected CHO cells		10	0.25 μCi/mL of [3H]ES (for OATP-1B1) or [3H]CCK-8 (for OATP-1B3)			https://doi.org/10.1515/dmdi-2014-0014	https://www.degruyter.com/view/j/dmdi.2014.29.issue-4/dmdi-2014-0014/dmdi-2014-0014.xml
Pazopanib	Parent			yes	>50% inhibition with 8Fc-A, >90% inhibition with E2G			HEK293/OATP1B1	15	15	estradiol-17β-ᴅ-glucuronide (1B1), 8-(2-[fluoresceinyl]-aminoethylthio)-adenosine-3′,5′-cyclic monophosphate (1B1, 1B3)	radioactivity		29337310	https://www.ncbi.nlm.nih.gov/pmc/articles/PMC5785270/pdf/jci-128-96160.pdf
Pazopanib	Parent			Yes	50% inhibition at 0.79 uM			CHO-OATP1B1	15-30	5	17b-D-glucuronide ([3H]-EG)	radioactivity		10.1038/sj.bjc.6605653	https://www.ncbi.nlm.nih.gov/pubmed/20389299
Pazopanib	Parent			No				HEK293/OATP1B1			SN-38	reverse-phase HPLC method	OATP1B1-mediated uptake of SN-38 was minimally reduced in the presence of 1–60 μM pazopanib. In contrast, addition of the representative OATP1B1 inhibitor rifampicin (30 μM) resulted in a 36% reduction in SN-38 uptake.	https://doi.org/10.1007/s00280-019-03784-8	https://link.springer.com/article/10.1007%2Fs00280-019-03784-8
Pazopanib	Parent			yes	>95% inhibition at 10 uM			OATP1B1 in Flp-In T-Rex29	15	5	0.1mM [3H]estradiol-17b-D-glucuronide (E2G)	Radioactivity		24398510	https://www.nature.com/articles/bjc2013811.pdf
Pazopanib	Parent			Yes	IC50 E1S: 1.42 ± 0.23, IC50 E2G: 13.5 ± 6.0			HEK293/OATP1B1	0	0.5	[3H]estrone-3-sulfate (E1S) and [3H] estradiol-17b-glucuronide	radioactivity	R value, which predicts the maximum increase in the AUC ratio of victim drugs, was calculated to be 1.09. These results suggest that pazopanib is preincubation-dependent but a shortlasting inhibitor against OATP1B1 with low potential of OATP1B1-mediated DDIs.		https://pubmed.ncbi.nlm.nih.gov/31703927/
Pazopanib	Parent			Yes	IC50 E1S:0.594 ± 0.030 IC50 E2G: 7.25 ± 0.53			HEK293/OATP1B2	1	0.5	[3H]estrone-3-sulfate (E1S) and [3H] estradiol-17b-glucuronide	radioactivity			https://pubmed.ncbi.nlm.nih.gov/31703927/
Pazopanib	Parent			Yes	IC50 E1S: 0.374 ± 0.074, IC50 E2G: 2.58 ± 0.77			HEK293/OATP1B4	30	0.5	[3H]estrone-3-sulfate (E1S) and [3H] estradiol-17b-glucuronide	radioactivity			https://pubmed.ncbi.nlm.nih.gov/31703927/
Pazopanib	Parent			Yes	IC50 E1S: 0.530 ± 0.022, IC50 E2G:2.03 ± 0.71			HEK293/OATP1B5	60	0.5	[3H]estrone-3-sulfate (E1S) and [3H] estradiol-17b-glucuronide	radioactivity			https://pubmed.ncbi.nlm.nih.gov/31703927/
Regorafenib	Parent			No, inducer	30% stimulation			HEK293/OATP1B6	10	2	Atorvastatin (0.5 mM)	fluerescence	other substrates not significant		https://www.tandfonline.com/doi/abs/10.1080/00498254.2017.1393582?casa_token=xCb1eTyWh9cAAAAA:nLXT4BlWQR0gjQG9XjFQWAT8m3juSL3DQvYhXjN8_jnb3IukTeLSryRHDxyQRFSmqQ6XDjYKcy-j
Regorafenib	Parent			yes	(IC50~10uL?)	no		HEK293/OATP1B1/1B3	2	2	estrone-3-sulfate (1B1)/taurocholic acid (1B3)				https://www.jstage.jst.go.jp/article/bpb/advpub/0/advpub_b14-00740/_pdf/-char/ja
Regorafenib	Parent			yes	>50% inhibition at 10 uM			OATP1B1 in Flp-In T-Rex29	15	5	0.1mM [3H]estradiol-17b-D-glucuronide (E2G)	Radioactivity		24398510	https://www.nature.com/articles/bjc2013811.pdf
Regorafenib	Parent			yes	>50% inhibition			HEK293/OATP1B1	15		estradiol-17β-ᴅ-glucuronide, 8-(2-[fluoresceinyl]-aminoethylthio)-adenosine-3′,5′-cyclic monophosphate	radioactivity			https://www.ncbi.nlm.nih.gov/pmc/articles/PMC5785270/pdf/jci-128-96160.pdf
Roxulotinib	Parent			yes	>25% inhibition at 10 uM on 8Fc-A			HEK293/OATP1B1	15		estradiol-17β-ᴅ-glucuronide, 8-(2-[fluoresceinyl]-aminoethylthio)-adenosine-3′,5′-cyclic monophosphate	radioactivity		29337310	https://www.ncbi.nlm.nih.gov/pmc/articles/PMC5785270/pdf/jci-128-96160.pdf
Ruxolitinib	Parent			No				HepaRG		Unclear - 30 minute co-incubation per	4 nM E3S	Radioactivity		29162613	http://dmd.aspetjournals.org/content/46/2/131
Ruxolitinib	Parent			Yes	~20% inhibition at 10uM			OATP1B1 in Flp-In T-Rex29	15	5	0.1mM [3H]estradiol-17b-D-glucuronide (E2G)	Radioactivity		24398510	https://www.nature.com/articles/bjc2013811.pdf
Sorafenib	Parent			yes	>75% at 10 uM on both			HEK293/OATP1B1	15		estradiol-17β-ᴅ-glucuronide, 8-(2-[fluoresceinyl]-aminoethylthio)-adenosine-3′,5′-cyclic monophosphate	radioactivity		29337310	https://www.ncbi.nlm.nih.gov/pmc/articles/PMC5785270/pdf/jci-128-96160.pdf
Sorafenib	Parent			yes	>90% inhibition at 10 uM			Flp-In T-Rex293 cells transfected with OATP1B1*1A	15	5	[3H]estradiol-17b-D-glucuronide (E2G) (0.1 mM;	radioactivity			https://www.nature.com/articles/bjc2013811
Sorafenib	Parent			yes	50% inhibition at 69.6uM			Flp-In T-Rex293 cells transfected with OATP1B1*1A	15	5	[3H]docetaxel (0.1 mM)	radioactivity			https://www.nature.com/articles/bjc2013812
Sorafenib	Parent			No				HEK/OATP1B1	10	2	FL (3 mM)	the fluorescence			https://www.tandfonline.com/doi/abs/10.1080/00498254.2017.1393582?casa_token=xCb1eTyWh9cAAAAA:nLXT4BlWQR0gjQG9XjFQWAT8m3juSL3DQvYhXjN8_jnb3IukTeLSryRHDxyQRFSmqQ6XDjYKcy-j
Sorafenib	Parent			No				HEK/OATP1B1	10	2	DCF (1 mM)	the fluorescence			https://www.tandfonline.com/doi/abs/10.1080/00498254.2017.1393582?casa_token=xCb1eTyWh9cAAAAA:nLXT4BlWQR0gjQG9XjFQWAT8m3juSL3DQvYhXjN8_jnb3IukTeLSryRHDxyQRFSmqQ6XDjYKcy-j
Sorafenib	Parent			No				HEK/OATP1B1	10	2	atorvastatin (0.5 mM)	the fluorescence			https://www.tandfonline.com/doi/abs/10.1080/00498254.2017.1393582?casa_token=xCb1eTyWh9cAAAAA:nLXT4BlWQR0gjQG9XjFQWAT8m3juSL3DQvYhXjN8_jnb3IukTeLSryRHDxyQRFSmqQ6XDjYKcy-j
Sorafenib	Parent			No				HEK/OATP1B1	10	0.5	SN-38 (1 mM)	the fluorescence			https://www.tandfonline.com/doi/abs/10.1080/00498254.2017.1393582?casa_token=xCb1eTyWh9cAAAAA:nLXT4BlWQR0gjQG9XjFQWAT8m3juSL3DQvYhXjN8_jnb3IukTeLSryRHDxyQRFSmqQ6XDjYKcy-j
Sorafenib	Parent			No				HEK/OATP1B1	10	0.5	valsartan (1 mM)	the fluorescence			https://www.tandfonline.com/doi/abs/10.1080/00498254.2017.1393582?casa_token=xCb1eTyWh9cAAAAA:nLXT4BlWQR0gjQG9XjFQWAT8m3juSL3DQvYhXjN8_jnb3IukTeLSryRHDxyQRFSmqQ6XDjYKcy-j
Sorafenib	Parent	No, 96 ± 7% function remaining after incubation with 10uM	Yes, 68 ± 0.5% function remaining after incubation with 10uM	No	96 ± 7% inhibition at 10uM	Yes	68 ± 0.5% function remaining after incubation with 10uM	HEK293/OATP1B1 or 3	None?	8	300nM E3S (1B1) or 2nM CCK-8 (1B3)	radioactivity		25165131	http://dmd.aspetjournals.org/content/42/11/1851.long
Sorafenib	N-Hydroxymethylsorafenib N-oxide	Yes, 64 ± 9% function remaining after incubation with 10uM	Yes, 66 ± 4% function remaining after incubation with 10uM	Yes	64 ± 9% inhibition at 10uM	Yes	66 ± 4% function remaining after incubation with 10uM	HEK293/OATP1B1 or 3	None?	8	300nM E3S (1B1) or 2nM CCK-8 (1B3)	radioactivity		25165131	http://dmd.aspetjournals.org/content/42/11/1851.long
Sorafenib	Sorafenib N-oxide	Yes, 81 ± 1% function remaining after incubation with 10uM	No, 80 ± 3% function remaining after incubation with 10uM	Yes	81 ± 1% inhibition at 10uM	No	80 ± 3% function remaining after incubation with 10uM	HEK293/OATP1B1 or 3	None?	8	300nM E3S (1B1) or 2nM CCK-8 (1B3)	radioactivity		25165131	http://dmd.aspetjournals.org/content/42/11/1851.long
Sorafenib	N-Hydroxymethylsorafenib	No, 101 ± 4% function remaining after incubation with 10uM	No, 113 ± 8% function remaining after incubation with 10uM	No	101 ± 4% stimulation at 10uM	No	113 ± 8% function remaining after incubation with 10uM	HEK293/OATP1B1 or 3	None?	8	300nM E3S (1B1) or 2nM CCK-8 (1B3)	radioactivity		25165131	http://dmd.aspetjournals.org/content/42/11/1851.long
Sorafenib	N-Desmethylsorafenib	Yes, 68 ± 0.55% function remaining after incubation with 10uM	No, 130 ± 9% function remaining after incubation with 10uM	Yes	68 ± 0.55% inhibition at 10uM	No	130 ± 9% function remaining after incubation with 10uM	HEK293/OATP1B1 or 3	None?	8	300nM E3S (1B1) or 2nM CCK-8 (1B3)	radioactivity		25165131	http://dmd.aspetjournals.org/content/42/11/1851.long
Sorafenib	N-Desmethylsorafenib N-oxide	No, 108 ± 2% function remaining after incubation with 10uM	No, 96 ± 4% function remaining after incubation with 10uM	No	108 ± 2% stimulation at 10uM	No	96 ± 4% function remaining after incubation with 10uM	HEK293/OATP1B1 or 3	None?	8	300nM E3S (1B1) or 2nM CCK-8 (1B3)	radioactivity		25165131	http://dmd.aspetjournals.org/content/42/11/1851.long
Sunitinib	Parent			yes	>25% decrease at 10 uM			Flp-In T-Rex293 cells transfected with OATP1B1*1A	15	5	[3H]estradiol-17b-D-glucuronide (E2G) (0.1 mM;	radioactivity			https://www.nature.com/articles/bjc2013811
Sunitinib	Parent			No	109 ± 10% stimulation at 10uM	No	101 ± 10% function remaining after incubation with 10uM	HEK293/OATP1B1 or 3	None?	8	300nM E3S (1B1) or 2nM CCK-8 (1B3)	radioactivity		25165131	http://dmd.aspetjournals.org/content/42/11/1851.long
Sunitinib	Parent			yes	>25% inhibition			HEK293/OATP1B1	15		estradiol-17β-ᴅ-glucuronide, 8-(2-[fluoresceinyl]-aminoethylthio)-adenosine-3′,5′-cyclic monophosphate	radioactivity			https://www.ncbi.nlm.nih.gov/pmc/articles/PMC5785270/pdf/jci-128-96160.pdf
Vandetanib	Parent			yes	>25% inhibition at 10 uM			Flp-In T-Rex293 cells transfected with OATP1B1*1A	15	5	[3H]estradiol-17b-D-glucuronide (E2G) (0.1 mM;	radioactivity			https://www.nature.com/articles/bjc2013811
Vandetanib	Parent			No		yes	IC50: 18.13 ± 1.21	OATP-1B1 and -1B3 transfected CHO cells		10	0.25 μCi/mL of [3H]ES (for OATP-1B1) or [3H]CCK-8 (for OATP-1B3)	radioactivity	[3H]ES and [3H]CCK-8 were employed as radiolabeled probe substrates for OATP-1B1 and -1B3 transporter proteins, respectively. Cellular accumulation of [3H]ES was measured by exposing OATP-1B1 transfected CHO cells to two different concentrations (25 and 50 μM) of TKIs and rifampicin (positive control).		https://www.degruyter.com/view/j/dmdi.2014.29.issue-4/dmdi-2014-0014/dmdi-2014-0014.xml
Vandetinib	Parent	No, 110 ± 6% function remaining after incubation with 10uM	Yes, 71 ± 5% function remaining after incubation with 10uM	No	110 ± 6% stimulation at 10uM	yes	71± 5% function remaining after incubation with 10uM	HEK293/OATP1B1 or 3	None?	8	300nM E3S (1B1) or 2nM CCK-8 (1B3)	radioactivity		25165131	http://dmd.aspetjournals.org/content/42/11/1851.long
Vandetinib	Parent			yes	>25% inhibition at 10 uM			HEK293/OATP1B1	15		estradiol-17β-ᴅ-glucuronide, 8-(2-[fluoresceinyl]-aminoethylthio)-adenosine-3′,5′-cyclic monophosphate	radioactivity		29337310	https://www.ncbi.nlm.nih.gov/pmc/articles/PMC5785270/pdf/jci-128-96160.pdf
Vemurafenib	Parent			yes	>70% inhibition at 10 uM			Flp-In T-Rex293 cells transfected with OATP1B1*1A	15	5	[3H]estradiol-17b-D-glucuronide (E2G) (0.1 mM;	radioactivity			https://www.nature.com/articles/bjc2013811
Vemurafenib	Parent			yes	>70% inhibition at 10 uM on both			HEK293/OATP1B1	15		estradiol-17β-ᴅ-glucuronide, 8-(2-[fluoresceinyl]-aminoethylthio)-adenosine-3′,5′-cyclic monophosphate	radioactivity		29337310	https://www.ncbi.nlm.nih.gov/pmc/articles/PMC5785270/pdf/jci-128-96160.pdf

[truncated: 3 more sheets: references of interest, As Substrate, Reference of Interest]
